# Supplementary material for: Investigation of the functional relationship between antecedent rainfall and the probability of debris flow occurrence in Jiangjia Gully, China
Source: Copernicus journal article supplement (doi:10.5194/hess-2022-263), 2022-09-05
Supplement: Supplementary file 1 [file appendix 1-1094 rainfall and 37 debris flow data.xlsx]

## Sheet: Sheet1
date of rainfall strat	start time	ending date	end time	total rainfall amount	duration	AEP	round (AEP)	D	I	debris flow(yes or no)	prob						observation restuls			simulation results
2017-07-03	16:35	2017-07-03	20:00	1.2	0.142361	87.9268	88	3.41667	0.35122	N							AEP	prob		AEP	prob		correlation coe
2019-07-23	19:15	2019-07-24	01:40	10	0.267361	86.7914	87	6.41667	1.55844	N							80	20		80	12.998		0.933135
2012-06-24	17:55	2012-06-24	18:25	1	0.0208333	85.6136	86	0.5	2	N							75	12.5		75	10.3588
2019-07-24	17:10	2019-07-24	17:45	1.3	0.0243056	83.5833	84	0.583333	2.22857	N							55	9.7		55	4.17872
2019-07-24	06:25	2019-07-24	06:55	0.5	0.0208333	83.3353	83	0.5	1	N		·					50	10.2		50	3.33025
2019-07-24	11:50	2019-07-24	12:20	1.8	0.0208333	83.139	83	0.5	3.6	N							40	3.8		40	2.11516
2019-07-25	00:15	2019-07-25	00:20	0.2	0.00347222	82.0843	82	0.0833333	2.4	N							35	4.5		35	1.68569
2014-09-19	14:10	2014-09-19	16:00	1.4	0.0763889	81.8335	82	1.83333	0.763636	N							30	5.6		30	1.34342
2012-06-23	00:30	2012-06-23	02:35	5.5	0.0868056	81.715	82	2.08333	2.64	N							25	5.5		25	1.07064
2007-07-26	17:36:00	2007-07-26	17:59:00	2.8	0.0159722	79.6208	80	0.383333	7.30435	N	prob=1/5=20%						20	1.8		20	0.853252
2017-07-02	12:25	2017-07-02	13:05	0.8	0.0277778	78.3383	78	0.666667	1.2	N							15	2.3		15	0.680003
2012-06-23	20:45	2012-06-24	10:05	23.3	0.555556	77.5827	78	13.3333	1.7475	N
2014-09-20	04:15	2014-09-20	09:30	3.5	0.21875	77.5633	78	5.25	0.666667	N
2019-07-23	10:45	2019-07-23	14:45	12.5	0.166667	76.262	76	4	3.125	Y
2017-07-02	22:25	2017-07-03	07:20	25.3	0.371528	74.8419	75	8.91667	2.83738	Y	prob=1/8=12.5%
2017-08-26	02:40	2017-08-26	04:05	1.7	0.0590278	74.7245	75	1.41667	1.2	N
2018-06-25	16:05	2018-06-25	18:45	11.7	0.111111	73.6167	74	2.66667	4.3875	N
2017-07-01	21:25	2017-07-02	04:35	15.8	0.298611	72.5275	73	7.16667	2.20465	N
2019-07-25	15:30	2019-07-25	15:40	2.3	0.00694444	72.2396	72	0.166667	13.8	N
2017-07-09	06:05	2017-07-09	06:25	0.3	0.0138889	70.4445	70	0.333333	0.9	N
2018-08-05	00:30	2018-08-05	00:35	0.4	0.00347222	70.1189	70	0.0833333	4.8	N
2017-07-09	09:25	2017-07-09	14:00	3.3	0.190972	69.5486	70	4.58333	0.72	N
2019-07-21	01:50	2019-07-21	01:55	0.4	0.00347222	68.149	68	0.0833333	4.8	N
2019-07-20	19:45	2019-07-20	19:55	1.1	0.00694444	67.3078	67	0.166667	6.6	N
2013-08-26	02:05:00	2013-08-26	02:10:00	0.1	0.00347222	66.8522	67	0.0833333	1.2	N
2013-08-26	01:25:00	2013-08-26	01:30:00	0.1	0.00347222	66.8356	67	0.0833333	1.2	N
2019-07-20	14:55	2019-07-20	15:05	1.1	0.00694444	66.5064	67	0.166667	6.6	N
2012-06-26	03:45	2012-06-26	04:30	0.7	0.03125	66.4755	66	0.75	0.933333	N
2008-08-08	19:12:00	2008-08-08	20:05:00	0.8	0.0368056	66.0023	66	0.883333	0.90566	N
2014-07-15	23:45	2014-07-16	03:20	2.2	0.149306	65.5317	66	3.58333	0.613953	N
2008-08-09	01:20:00	2008-08-09	01:53:00	0.5	0.0229167	64.2621	64	0.55	0.909091	N
2014-06-07	10:40	2014-06-07	13:40	1.2	0.125	63.3969	63	3	0.4	N
2012-07-26	14:35	2012-07-26	16:25	0.9	0.0763889	63.0142	63	1.83333	0.490909	N
2019-07-20	09:50	2019-07-20	11:05	4.5	0.0520833	62.6022	63	1.25	3.6	N
2008-08-09	12:34:00	2008-08-09	13:52:00	3.2	0.0541667	62.1605	62	1.3	2.46154	N
2008-08-09	06:51:00	2008-08-09	08:45:00	0.6	0.0791667	62.0944	62	1.9	0.315789	N
2008-08-09	18:22:00	2008-08-09	21:21:00	2.7	0.124306	62.0367	62	2.98333	0.905028	N
2018-06-25	09:00	2018-06-25	11:45	14.7	0.114583	61.5426	62	2.75	5.34545	N
2019-07-20	06:05	2019-07-20	06:20	2.1	0.0104167	61.5133	62	0.25	8.4	N
2009-08-05	01:29:00	2009-08-05	10:29:00	3.1	0.375	61.4701	61	9	0.344444	N
2017-06-30	16:50	2017-07-01	06:10	30.4	0.555556	61.3685	61	13.3333	2.28	N
2019-08-01	14:15	2019-08-01	15:50	7.7	0.0659722	61.3025	61	1.58333	4.86316	N
2009-06-29	19:15:00	2009-06-30	03:51:00	13	0.358333	61.1625	61	8.6	1.51163	N
2014-07-21	05:50	2014-07-21	10:25	1.6	0.190972	60.6292	61	4.58333	0.349091	N
2018-06-24	16:50	2018-06-24	17:40	12.6	0.0347222	60.0552	60	0.833333	15.12	N
2013-08-26	14:00:00	2013-08-26	14:05:00	0.1	0.00347222	59.8018	60	0.0833333	1.2	N
2017-08-29	02:35	2017-08-29	16:00	10.1	0.559028	59.5813	60	13.4167	0.752795	N
2012-08-02	06:30	2012-08-02	06:40	1.4	0.00694444	59.3722	59	0.166667	8.4	N
2019-09-09	23:40	2019-09-10	01:20	6.3	0.0694444	58.7816	59	1.66667	3.78	N
2017-08-27	16:55	2017-08-27	17:05	1.6	0.00694444	58.7686	59	0.166667	9.6	N
2012-07-28	16:20	2012-07-28	18:25	2.8	0.0868056	58.3941	58	2.08333	1.344	N
2019-07-31	19:50	2019-08-01	00:40	11.6	0.201389	58.2238	58	4.83333	2.4	N
2014-07-12	11:35	2014-07-12	14:50	3.8	0.135417	58.1639	58	3.25	1.16923	N
2017-08-29	20:15	2017-08-29	20:50	1.7	0.0243056	58.1505	58	0.583333	2.91429	N
2014-07-21	15:35	2014-07-21	17:55	1.2	0.0972222	57.7457	58	2.33333	0.514286	N
2012-08-02	18:30	2012-08-02	19:10	4.7	0.0277778	57.1218	57	0.666667	7.05	N
2012-07-31	14:10	2012-07-31	21:00	6.2	0.284722	57.0899	57	6.83333	0.907317	N
2012-06-27	04:45	2012-06-27	07:10	2.4	0.100694	56.2175	56	2.41667	0.993103	N
2014-06-08	07:55	2014-06-08	10:40	0.7	0.114583	56.0977	56	2.75	0.254545	N
2009-08-04	17:09:00	2009-08-04	21:09:00	6.3	0.166667	56.0708	56	4	1.575	N
2019-09-11	00:40	2019-09-11	03:00	3.7	0.0972222	55.9485	56	2.33333	1.58571	N
2017-08-28	21:10	2017-08-28	23:20	5.9	0.0902778	55.9203	56	2.16667	2.72308	N
2019-09-10	18:10	2019-09-10	18:50	0.9	0.0277778	55.639	56	0.666667	1.35	N
2008-06-16	09:16:00	2008-06-16	16:37:00	6.2	0.30625	55.3457	55	7.35	0.843537	N	prob=3/31=9.7%
2018-08-06	15:40	2018-08-06	15:45	0.9	0.00347222	55.2252	55	0.0833333	10.8	N
2016-06-15	23:10	2016-06-16	11:15	22.2	0.503472	55.128	55	12.0833	1.83724	N
2012-08-01	21:40	2012-08-02	02:25	10.6	0.197917	54.9717	55	4.75	2.23158	N
2012-08-01	14:05	2012-08-01	17:50	3.3	0.15625	54.728	55	3.75	0.88	N
2008-06-16	23:58:00	2008-06-17	13:10:00	17.6	0.55	54.5692	55	13.2	1.33333	N
2019-07-31	03:05	2019-07-31	05:30	10.9	0.100694	54.1218	54	2.41667	4.51034	N
2012-08-01	05:45	2012-08-01	07:55	1.9	0.0902778	54.0437	54	2.16667	0.876923	N
2020-09-17	06:55	2020-09-17	09:05	2.1	0.0902778	53.7292	54	2.16667	0.969231	N
2014-07-05	17:15	2014-07-05	18:15	4.9	0.0416667	53.629	54	1	4.9	N
2019-09-09	16:10	2019-09-09	19:00	6.5	0.118056	53.6011	54	2.83333	2.29412	N
2017-07-06	05:00	2017-07-06	07:15	6.8	0.09375	53.4922	53	2.25	3.02222	N
2007-07-24	17:43:00	2007-07-25	17:33:00	59.6	0.993056	53.3823	53	23.8333	2.5007	Y
2014-07-22	09:15	2014-07-22	12:00	2.5	0.114583	53.0552	53	2.75	0.909091	N
2017-07-07	01:40	2017-07-07	13:20	55	0.486111	53.0284	53	11.6667	4.71429	Y
2014-07-07	14:35	2014-07-07	16:40	2.8	0.0868056	52.6635	53	2.08333	1.344	N
2012-07-27	18:45	2012-07-27	18:55	1.5	0.00694444	52.3531	52	0.166667	9	N
2015-06-22	11:15	2015-06-22	11:30	0.4	0.0104167	52.2674	52	0.25	1.6	N
2014-07-07	22:55	2014-07-07	23:10	2	0.0104167	51.9708	52	0.25	8	N
2017-08-28	15:45	2017-08-28	18:00	7.7	0.09375	51.7662	52	2.25	3.42222	N
2014-07-22	18:05	2014-07-22	18:20	0.2	0.0104167	51.738	52	0.25	0.8	N
2010-06-28	12:02:00	2010-06-28	17:22:00	3.1	0.222222	51.2917	51	5.33333	0.58125	N
2018-07-09	00:25	2018-07-09	03:50	4.5	0.142361	50.7351	51	3.41667	1.31707	N
2010-06-29	04:30:00	2010-06-29	11:52:00	21.6	0.306944	50.7061	51	7.36667	2.93213	N
2007-08-28	00:57:00	2007-08-28	01:53:00	1	0.0388889	50.7051	51	0.933333	1.07143	N
2012-07-28	01:45	2012-07-28	07:00	17.3	0.21875	50.5117	51	5.25	3.29524	N
2008-08-05	13:58:00	2008-08-05	14:03:00	1.5	0.00347222	50.3957	50	0.0833333	18	Y
2014-07-11	14:35	2014-07-11	15:45	18.3	0.0486111	50.1082	50	1.16667	15.6857	N
2015-06-22	04:45	2015-06-22	06:15	10.1	0.0625	50.1022	50	1.5	6.73333	N
2018-10-02	03:05	2018-10-02	03:15	0.4	0.00694444	50.0224	50	0.166667	2.4	N
2007-07-21	21:31:00	2007-07-21	22:00:00	0.4	0.0201389	49.7983	50	0.483333	0.827586	N
2007-07-24	11:12:00	2007-07-24	13:11:00	4.9	0.0826389	49.2899	49	1.98333	2.47059	N	prob=5/49=10.2%
2016-08-15	22:55	2016-08-16	05:10	10.8	0.260417	48.5571	49	6.25	1.728	N
2012-07-17	21:25	2012-07-18	03:35	2.9	0.256944	48.437	48	6.16667	0.47027	N
2007-07-29	16:14:00	2007-07-29	17:12:00	1.8	0.0402778	48.4269	48	0.966667	1.86207	N
2018-08-11	08:40	2018-08-11	11:20	4.7	0.111111	48.3718	48	2.66667	1.7625	N
2008-08-04	14:37:00	2008-08-04	15:10:00	10.7	0.0229167	48.3588	48	0.55	19.4545	Y
2019-07-22	21:40	2019-07-23	05:25	40.8	0.322917	48.2172	48	7.75	5.26452	Y
2007-07-30	02:15:00	2007-07-30	05:11:00	13.8	0.122222	48.0926	48	2.93333	4.70455	Y
2006-07-07	23:36:00	2006-07-08	03:58:00	2.5	0.181944	48.0655	48	4.36667	0.572519	N
2007-08-02	07:24:00	2007-08-02	07:52:00	0.3	0.0194444	48.0046	48	0.466667	0.642857	N
2017-06-19	10:05	2017-06-19	13:25	2	0.138889	47.9727	48	3.33333	0.6	N
2008-08-03	20:14:00	2008-08-03	21:32:00	6.3	0.0541667	47.8449	48	1.3	4.84615	Y
2008-08-05	22:17:00	2008-08-06	01:39:00	3.1	0.140278	47.7857	48	3.36667	0.920792	N
2009-06-28	21:12:00	2009-06-28	21:26:00	0.7	0.00972222	47.7084	48	0.233333	3	N
2007-08-02	12:36:00	2007-08-02	19:55:00	6.3	0.304861	47.5394	48	7.31667	0.861048	N
2012-07-23	00:35	2012-07-23	09:25	3.5	0.368056	47.5269	48	8.83333	0.396226	N
2018-08-12	02:25	2018-08-12	05:05	4.9	0.111111	47.3683	47	2.66667	1.8375	N
2012-07-19	14:00	2012-07-19	18:30	6.6	0.1875	46.9918	47	4.5	1.46667	N
2008-08-03	16:28:00	2008-08-03	16:39:00	0.7	0.00763889	46.9562	47	0.183333	3.81818	N
2010-07-29	15:24:00	2010-07-29	16:17:00	8	0.0368056	46.8707	47	0.883333	9.0566	N
2012-07-18	06:35	2012-07-18	09:05	0.4	0.104167	46.8661	47	2.5	0.16	N
2008-07-04	05:30:00	2008-07-04	14:16:00	4.6	0.365278	46.7985	47	8.76667	0.524715	N
2016-07-01	11:20	2016-07-01	12:15	1.1	0.0381944	46.7908	47	0.916667	1.2	N
2020-08-17	22:25	2020-08-18	02:35	2.9	0.173611	46.7133	47	4.16667	0.696	N
2013-08-20	09:50:00	2013-08-20	19:20:00	7.1	0.395833	46.5693	47	9.5	0.747368	N
2018-08-10	01:30	2018-08-10	04:15	14.8	0.114583	46.5161	47	2.75	5.38182	N
2007-07-20	12:09:00	2007-07-21	08:49:00	14.4	0.861111	46.2626	46	20.6667	0.696774	N
2014-06-16	19:55	2014-06-16	20:55	1.4	0.0416667	46.1011	46	1	1.4	N
2019-07-11	02:25	2019-07-11	02:40	0.5	0.0104167	46.0668	46	0.25	2	N
2020-07-01	11:55	2020-07-01	12:35	0.5	0.0277778	46.0635	46	0.666667	0.75	N
2007-08-26	23:54:00	2007-08-27	00:36:00	1.1	0.0291667	45.9787	46	0.7	1.57143	N
2013-06-09	14:40:00	2013-06-09	15:25:00	2.4	0.03125	45.9761	46	0.75	3.2	N
2020-08-19	11:25	2020-08-19	11:45	0.5	0.0138889	45.9352	46	0.333333	1.5	N
2007-08-01	18:25:00	2007-08-02	02:47:00	7.6	0.348611	45.8881	46	8.36667	0.908367	N
2012-07-18	14:30	2012-07-18	18:05	2.9	0.149306	45.7621	46	3.58333	0.809302	N
2020-08-17	12:50	2020-08-17	16:20	2.7	0.145833	45.6914	46	3.5	0.771429	N
2006-07-07	13:56:00	2006-07-07	14:52:00	3.5	0.0388889	45.6312	46	0.933333	3.75	N
2020-08-18	05:50	2020-08-18	15:40	9.2	0.409722	45.4912	45	9.83333	0.935593	N
2019-07-30	13:20	2019-07-30	21:05	14.6	0.322917	45.4598	45	7.75	1.88387	N
2010-07-26	17:36:00	2010-07-26	17:41:00	0.2	0.00347222	45.0585	45	0.0833333	2.4	N
2008-07-03	16:15:00	2008-07-04	00:45:00	3.9	0.354167	44.907	45	8.5	0.458824	N
2017-06-20	03:30	2017-06-20	05:05	2.6	0.0659722	44.7779	45	1.58333	1.64211	N
2014-07-23	16:25	2014-07-23	16:30	0.1	0.00347222	44.7738	45	0.0833333	1.2	N
2008-07-05	04:15:00	2008-07-05	13:08:00	17.5	0.370139	44.7661	45	8.88333	1.96998	Y
2014-06-10	16:55	2014-06-10	17:25	0.3	0.0208333	44.7495	45	0.5	0.6	N
2013-06-10	03:10:00	2013-06-10	10:00:00	20.5	0.284722	44.7495	45	6.83333	3	N
2009-06-29	04:47:00	2009-06-29	12:03:00	19.8	0.302778	44.6145	45	7.26667	2.72477	N
2014-07-14	05:35	2014-07-14	05:50	0.7	0.0104167	44.5748	45	0.25	2.8	N
2014-07-24	23:10	2014-07-24	23:25	0.2	0.0104167	44.5161	45	0.25	0.8	N
2020-07-02	00:40	2020-07-02	02:40	8.3	0.0833333	44.3671	44	2	4.15	N
2009-06-27	18:57:00	2009-06-28	00:52:00	15.9	0.246528	44.3318	44	5.91667	2.68732	N
2014-06-10	00:50	2014-06-10	03:55	5.5	0.128472	44.2975	44	3.08333	1.78378	N
2014-06-10	12:50	2014-06-10	13:15	0.3	0.0173611	44.2882	44	0.416667	0.72	N
2012-07-19	03:35	2012-07-19	09:50	5.9	0.260417	44.2878	44	6.25	0.944	N
2007-07-22	08:32:00	2007-07-22	12:51:00	3.7	0.179861	44.2582	44	4.31667	0.857143	N
2018-08-07	20:55	2018-08-07	21:00	0.2	0.00347222	44.2147	44	0.0833333	2.4	N
2012-07-31	00:45	2012-07-31	06:00	20.3	0.21875	44.0257	44	5.25	3.86667	N
2010-07-19	07:45:00	2010-07-19	08:20:00	1	0.0243056	43.9743	44	0.583333	1.71429	N
2014-07-14	21:15	2014-07-15	18:30	34.9	0.885417	43.7604	44	21.25	1.64235	N
2012-07-30	15:45	2012-07-30	15:55	2.8	0.00694444	43.6561	44	0.166667	16.8	N
2014-06-10	19:35	2014-06-10	23:30	1	0.163194	43.5736	44	3.91667	0.255319	N
2017-06-29	23:30	2017-06-30	13:40	29.2	0.590278	43.55	44	14.1667	2.06118	N
2019-08-04	12:25	2019-08-04	13:15	5.6	0.0347222	43.5173	44	0.833333	6.72	N
2007-08-03	14:15:00	2007-08-03	16:59:00	10.5	0.113889	43.3992	43	2.73333	3.84146	N
2020-07-03	04:55	2020-07-03	05:15	0.6	0.0138889	43.3259	43	0.333333	1.8	N
2007-07-19	16:23:00	2007-07-19	23:10:00	10.4	0.282639	43.2762	43	6.78333	1.53317	N
2016-08-08	18:10	2016-08-08	20:30	5.3	0.0972222	42.9967	43	2.33333	2.27143	N
2014-06-21	01:55	2014-06-21	07:50	1.9	0.246528	42.9867	43	5.91667	0.321127	N
2014-09-23	16:55	2014-09-24	12:30	13	0.815972	42.9276	43	19.5833	0.66383	N
2018-07-08	10:10	2018-07-08	16:55	19.3	0.28125	42.8965	43	6.75	2.85926	N
2014-07-07	07:05	2014-07-07	09:05	12.9	0.0833333	42.7304	43	2	6.45	N
2013-08-18	22:55:00	2013-08-19	08:45:00	21.4	0.409722	42.6452	43	9.83333	2.17627	N
2019-08-03	19:55	2019-08-03	22:20	0.5	0.100694	42.5706	43	2.41667	0.206897	N
2014-08-12	13:00	2014-08-12	14:55	2.5	0.0798611	42.3922	42	1.91667	1.30435	N
2019-07-10	15:05	2019-07-10	20:00	8.4	0.204861	42.3374	42	4.91667	1.70847	N
2020-06-30	20:15	2020-07-01	06:45	9	0.4375	42.3264	42	10.5	0.857143	N
2020-07-13	12:40	2020-07-13	17:40	5.2	0.208333	42.2677	42	5	1.04	N
2020-09-23	11:05	2020-09-23	17:40	4.1	0.274306	42.2556	42	6.58333	0.622785	N
2016-05-22	22:35	2016-05-22	22:45	0.6	0.00694444	42.2193	42	0.166667	3.6	N
2016-06-13	06:55	2016-06-13	07:30	0.6	0.0243056	42.1479	42	0.583333	1.02857	N
2014-07-14	16:30	2014-07-14	18:15	2.8	0.0729167	42.14	42	1.75	1.6	N
2016-05-23	15:10	2016-05-24	08:30	13	0.722222	42.0476	42	17.3333	0.75	N
2019-08-08	22:55	2019-08-09	02:00	3	0.128472	42.0219	42	3.08333	0.972973	N
2007-08-27	17:17:00	2007-08-27	19:39:00	13.3	0.0986111	41.945	42	2.36667	5.61972	N
2016-06-12	00:20	2016-06-12	07:35	8.9	0.302083	41.9402	42	7.25	1.22759	N
2006-07-19	03:43:00	2006-07-19	04:26:00	3	0.0298611	41.8209	42	0.716667	4.18605	N
2018-08-03	20:30	2018-08-04	15:50	44	0.805556	41.6687	42	19.3333	2.27586	N
2019-08-05	12:45	2019-08-05	13:30	0.8	0.03125	41.6663	42	0.75	1.06667	N
2010-08-02	14:15:00	2010-08-02	17:33:00	2.1	0.1375	41.6655	42	3.3	0.636364	N
2014-07-11	01:35	2014-07-11	05:45	13.8	0.173611	41.6021	42	4.16667	3.312	N
2020-07-03	10:05	2020-07-03	10:50	1.6	0.03125	41.5981	42	0.75	2.13333	N
2010-08-02	07:56:00	2010-08-02	08:47:00	1.2	0.0354167	41.5422	42	0.85	1.41176	N
2007-08-01	05:40:00	2007-08-01	10:28:00	7.6	0.2	41.5215	42	4.8	1.58333	N
2018-07-26	13:45	2018-07-26	17:25	1.9	0.152778	41.383	41	3.66667	0.518182	N
2016-06-19	10:15	2016-06-19	16:45	9.2	0.270833	41.3196	41	6.5	1.41538	N
2012-07-15	02:55	2012-07-15	03:20	1.5	0.0173611	41.2808	41	0.416667	3.6	N
2019-08-05	16:30	2019-08-05	17:15	3.5	0.03125	41.2732	41	0.75	4.66667	N
2020-07-03	21:35	2020-07-03	23:25	10	0.0763889	41.2312	41	1.83333	5.45455	N
2006-07-18	17:49:00	2006-07-18	19:41:00	3.6	0.0777778	41.1626	41	1.86667	1.92857	N
2018-10-03	06:15	2018-10-03	07:00	0.4	0.03125	41.1421	41	0.75	0.533333	N
2014-07-18	15:20	2014-07-18	16:15	5.9	0.0381944	41.0579	41	0.916667	6.43636	N
2017-06-21	02:35	2017-06-21	04:45	4	0.0902778	40.9887	41	2.16667	1.84615	N
2019-08-04	04:20	2019-08-04	08:05	5.3	0.15625	40.8381	41	3.75	1.41333	N
2017-07-12	14:40	2017-07-12	15:05	0.3	0.0173611	40.7225	41	0.416667	0.72	N
2014-07-10	17:45	2014-07-10	18:05	3	0.0138889	40.5504	41	0.333333	9	N
2008-06-14	23:16:00	2008-06-15	05:37:00	2.2	0.264583	40.4961	40	6.35	0.346457	N	prob=4/106=3.8%
2018-06-29	16:15	2018-06-29	16:45	2.2	0.0208333	40.3683	40	0.5	4.4	N
2017-06-27	22:30	2017-06-27	23:15	0.5	0.03125	40.1609	40	0.75	0.666667	N
2018-07-08	02:10	2018-07-08	05:10	3.3	0.125	40.1099	40	3	1.1	N
2017-08-17	14:50	2017-08-17	16:20	3.1	0.0625	39.9374	40	1.5	2.06667	N
2014-06-30	00:25	2014-06-30	01:15	2.4	0.0347222	39.8305	40	0.833333	2.88	N
2008-08-07	12:09:00	2008-08-08	15:15:00	42.9	1.12917	39.7286	40	27.1	1.58303	Y
2014-06-16	13:05	2014-06-16	16:55	7.9	0.159722	39.7139	40	3.83333	2.06087	N
2019-07-10	07:35	2019-07-10	10:10	3.6	0.107639	39.645	40	2.58333	1.39355	N
2016-09-08	06:15	2016-09-08	06:25	1.4	0.00694444	39.5479	40	0.166667	8.4	N
2014-07-24	14:05	2014-07-24	14:50	7.7	0.03125	39.4325	39	0.75	10.2667	N
2019-07-13	10:25	2019-07-13	13:50	1.1	0.142361	39.1726	39	3.41667	0.321951	N
2019-08-09	17:50	2019-08-09	20:50	7.5	0.125	39.1352	39	3	2.5	N
2020-07-09	12:10	2020-07-09	15:10	4.6	0.125	39.1282	39	3	1.53333	N
2016-05-23	07:30	2016-05-23	11:40	5.1	0.173611	39.1239	39	4.16667	1.224	N
2014-06-30	09:20	2014-06-30	09:25	0.1	0.00347222	39.0369	39	0.0833333	1.2	N
2018-08-18	07:15	2018-08-18	07:45	0.7	0.0208333	38.9451	39	0.5	1.4	N
2013-08-18	12:30:00	2013-08-18	15:30:00	7.4	0.125	38.9228	39	3	2.46667	N
2008-06-15	10:43:00	2008-06-16	03:37:00	24.2	0.704167	38.8736	39	16.9	1.43195	N
2010-06-28	05:27:00	2010-06-28	07:52:00	16.1	0.100694	38.8523	39	2.41667	6.66207	N
2010-07-31	15:39:00	2010-07-31	16:07:00	1.4	0.0194444	38.8116	39	0.466667	3	N
2009-07-05	15:41:00	2009-07-05	16:47:00	0.8	0.0458333	38.7516	39	1.1	0.727273	N
2019-07-30	05:55	2019-07-30	09:25	8.3	0.145833	38.6871	39	3.5	2.37143	N
2014-07-25	17:10	2014-07-25	18:20	6.6	0.0486111	38.6286	39	1.16667	5.65714	N
2019-06-30	02:10	2019-06-30	02:15	0.2	0.00347222	38.5704	39	0.0833333	2.4	N
2014-07-03	17:30	2014-07-04	00:50	39.3	0.305556	38.5223	39	7.33333	5.35909	N
2012-08-05	21:35	2012-08-05	21:55	1.9	0.0138889	38.5	38	0.333333	5.7	N
2007-07-24	00:31:00	2007-07-24	06:34:00	17.5	0.252083	38.3477	38	6.05	2.89256	Y
2015-07-02	00:40	2015-07-02	02:05	8.6	0.0590278	38.2714	38	1.41667	6.07059	N
2014-06-29	18:25	2014-06-29	19:00	1.9	0.0243056	38.2707	38	0.583333	3.25714	N
2019-07-14	01:00	2019-07-14	04:45	1.6	0.15625	38.1594	38	3.75	0.426667	N
2014-07-28	15:00	2014-07-28	15:30	3	0.0208333	38.0323	38	0.5	6	N
2020-05-28	01:50	2020-05-28	02:10	0.3	0.0138889	38.0076	38	0.333333	0.9	N
2020-07-12	23:50	2020-07-13	09:05	7.2	0.385417	37.9549	38	9.25	0.778378	N
2013-08-16	15:25:00	2013-08-16	15:35:00	0.4	0.00694444	37.9059	38	0.166667	2.4	N
2008-08-01	19:19:00	2008-08-01	19:24:00	0.1	0.00347222	37.828	38	0.0833333	1.2	N
2018-08-08	17:30	2018-08-08	17:50	2.1	0.0138889	37.8222	38	0.333333	6.3	N
2009-07-05	05:06:00	2009-07-05	06:29:00	1.5	0.0576389	37.8142	38	1.38333	1.08434	N
2012-07-16	19:00	2012-07-16	23:35	20	0.190972	37.8	38	4.58333	4.36364	N
2018-10-03	23:25	2018-10-04	02:25	2	0.125	37.7646	38	3	0.666667	N
2012-07-16	13:30	2012-07-16	15:15	0.3	0.0729167	37.7573	38	1.75	0.171429	N
2006-07-01	05:52:00	2006-07-01	06:04:00	1.2	0.00833333	37.7384	38	0.2	6	N
2010-07-10	19:48:00	2010-07-10	23:16:00	1.6	0.144444	37.6662	38	3.46667	0.461538	N
2008-07-29	13:35:00	2008-07-29	13:37:00	0.6	0.00138889	37.6607	38	0.0333333	18	N
2014-07-20	02:30	2014-07-21	02:40	36.2	1.00694	37.4811	37	24.1667	1.49793	N
2012-07-16	08:30	2012-07-16	09:25	0.8	0.0381944	37.387	37	0.916667	0.872727	N
2017-07-13	06:20	2017-07-13	08:45	1.5	0.100694	37.3556	37	2.41667	0.62069	N
2016-08-07	18:05	2016-08-07	18:45	13.3	0.0277778	37.3216	37	0.666667	19.95	N
2008-07-24	20:43:00	2008-07-24	20:57:00	4.5	0.00972222	37.2595	37	0.233333	19.2857	N
2017-07-13	15:05	2017-07-13	15:10	0.3	0.00347222	37.2218	37	0.0833333	3.6	N
2015-07-03	02:30	2015-07-03	03:00	0.3	0.0208333	37.1999	37	0.5	0.6	N
2013-08-29	08:50:00	2013-08-29	09:10:00	9.2	0.0138889	37.1795	37	0.333333	27.6	N
2014-07-19	22:00	2014-07-19	22:05	0.8	0.00347222	37.0915	37	0.0833333	9.6	N
2012-07-16	00:50	2012-07-16	05:25	4.3	0.190972	37.0157	37	4.58333	0.938182	N
2012-07-25	02:20	2012-07-26	03:50	43.2	1.0625	36.9973	37	25.5	1.69412	N
2008-07-28	23:33:00	2008-07-29	00:26:00	2.7	0.0368056	36.9697	37	0.883333	3.0566	N
2012-08-05	17:20	2012-08-05	18:10	2.7	0.0347222	36.952	37	0.833333	3.24	N
2016-08-14	14:15	2016-08-14	17:15	2.2	0.125	36.9362	37	3	0.733333	N
2008-07-19	15:31:00	2008-07-19	16:26:00	19.1	0.0381944	36.8046	37	0.916667	20.8364	N
2019-06-25	15:25	2019-06-25	17:40	0.4	0.09375	36.7696	37	2.25	0.177778	N
2010-07-11	05:22:00	2010-07-11	07:57:00	5	0.107639	36.7573	37	2.58333	1.93548	N
2012-06-30	00:45	2012-06-30	02:20	3.6	0.0659722	36.7246	37	1.58333	2.27368	N
2020-05-27	12:15	2020-05-27	18:00	3.9	0.239583	36.7235	37	5.75	0.678261	N
2015-06-11	12:05	2015-06-11	12:30	0.4	0.0173611	36.6979	37	0.416667	0.96	N
2009-07-04	22:07:00	2009-07-04	23:31:00	4.2	0.0583333	36.6907	37	1.4	3	N
2020-09-15	02:40	2020-09-15	03:35	2.6	0.0381944	36.6836	37	0.916667	2.83636	N
2010-07-20	18:15:00	2010-07-20	18:31:00	2.9	0.0111111	36.6675	37	0.266667	10.875	N
2010-07-28	01:37:00	2010-07-28	19:21:00	26.1	0.738889	36.5946	37	17.7333	1.4718	N
2016-06-22	01:15	2016-06-22	01:20	0.3	0.00347222	36.5918	37	0.0833333	3.6	N
2016-06-22	05:10	2016-06-22	06:10	0.8	0.0416667	36.4732	36	1	0.8	N
2018-08-09	04:25	2018-08-09	16:25	18	0.5	36.4521	36	12	1.5	N
2020-09-14	00:25	2020-09-14	08:15	7.3	0.326389	36.3854	36	7.83333	0.931915	N
2017-08-14	18:00	2017-08-15	03:10	29.6	0.381944	36.3778	36	9.16667	3.22909	N
2014-07-01	01:20	2014-07-01	02:15	3.7	0.0381944	36.2427	36	0.916667	4.03636	N
2019-07-29	19:25	2019-07-29	19:35	1	0.00694444	36.209	36	0.166667	6	N
2014-07-19	18:20	2014-07-19	18:25	0.9	0.00347222	36.1628	36	0.0833333	10.8	N
2012-06-30	17:55	2012-06-30	18:20	4.8	0.0173611	36.147	36	0.416667	11.52	N
2016-08-15	02:10	2016-08-15	02:30	0.9	0.0138889	36.1251	36	0.333333	2.7	N
2020-09-11	15:05	2020-09-11	15:15	0.4	0.00694444	36.1022	36	0.166667	2.4	N
2016-09-20	22:55	2016-09-21	10:15	4.8	0.472222	36.0411	36	11.3333	0.423529	N
2015-07-17	01:10	2015-07-17	02:40	2	0.0625	35.7095	36	1.5	1.33333	N
2020-05-17	11:20	2020-05-17	11:30	0.5	0.00694444	35.616	36	0.166667	3	N
2014-06-22	00:45	2014-06-22	01:25	1.3	0.0277778	35.6069	36	0.666667	1.95	N
2014-06-22	06:05	2014-06-22	06:40	0.8	0.0243056	35.5281	36	0.583333	1.37143	N
2016-08-10	23:05	2016-08-11	00:50	3.7	0.0729167	35.5155	36	1.75	2.11429	N
2008-07-26	18:17:00	2008-07-26	19:06:00	1.6	0.0340278	35.5098	36	0.816667	1.95918	N
2016-08-15	13:15	2016-08-15	18:35	18.1	0.222222	35.4807	35	5.33333	3.39375	N
2013-08-17	11:35:00	2013-08-17	14:35:00	2	0.125	35.4715	35	3	0.666667	N
2020-05-28	17:05	2020-05-29	02:20	4	0.385417	35.4668	35	9.25	0.432432	N
2014-08-12	03:00	2014-08-12	09:55	8.9	0.288194	35.4392	35	6.91667	1.28675	N
2014-07-10	03:15	2014-07-10	04:30	9.1	0.0520833	35.3554	35	1.25	7.28	N
2020-07-18	02:15	2020-07-18	05:10	0.8	0.121528	35.2908	35	2.91667	0.274286	N
2006-07-06	02:16:00	2006-07-06	04:32:00	23.5	0.0944444	35.2035	35	2.26667	10.3676	Y
2019-07-30	02:45	2019-07-30	02:55	6	0.00694444	35.0723	35	0.166667	36	N
2014-08-05	12:50	2014-08-05	16:40	10.5	0.159722	35.0643	35	3.83333	2.73913	N
2016-06-21	15:20	2016-06-21	15:35	0.2	0.0104167	35.014	35	0.25	0.8	N
2009-07-04	01:16:00	2009-07-04	06:19:00	5.8	0.210417	34.9639	35	5.05	1.14851	N
2017-07-15	06:40	2017-07-15	14:20	8.5	0.319444	34.9285	35	7.66667	1.1087	N
2018-07-26	07:15	2018-07-26	09:20	8.9	0.0868056	34.9149	35	2.08333	4.272	N
2016-06-21	19:35	2016-06-21	20:35	1.8	0.0416667	34.9059	35	1	1.8	N
2016-08-10	17:50	2016-08-10	20:05	3.5	0.09375	34.901	35	2.25	1.55556	N
2016-08-06	13:05	2016-08-06	17:05	13	0.166667	34.8348	35	4	3.25	N
2008-08-02	14:31:00	2008-08-02	15:45:00	2.7	0.0513889	34.8241	35	1.23333	2.18919	N
2010-07-22	19:53:00	2010-07-22	20:16:00	1.5	0.0159722	34.8163	35	0.383333	3.91304	Y
2018-07-07	14:35	2018-07-07	18:55	11.7	0.180556	34.7083	35	4.33333	2.7	N
2019-06-26	05:25	2019-06-26	08:30	4.6	0.128472	34.6889	35	3.08333	1.49189	N
2016-06-22	11:40	2016-06-22	12:20	1.5	0.0277778	34.4823	34	0.666667	2.25	N	prob=4/89=4.5%
2010-07-22	13:30:00	2010-07-22	13:58:00	2.4	0.0194444	34.4009	34	0.466667	5.14286	N
2008-07-03	07:09:00	2008-07-03	12:25:00	15.3	0.219444	34.3473	34	5.26667	2.90506	N
2014-06-29	00:40	2014-06-29	06:00	2.2	0.222222	34.3193	34	5.33333	0.4125	N
2012-08-07	10:05	2012-08-07	10:40	0.3	0.0243056	34.2224	34	0.583333	0.514286	N
2012-08-07	17:30	2012-08-07	19:25	2.4	0.0798611	33.9888	34	1.91667	1.25217	N
2019-08-07	01:15	2019-08-07	09:50	28.3	0.357639	33.9286	34	8.58333	3.29709	N
2017-06-26	23:40	2017-06-27	05:45	12.6	0.253472	33.837	34	6.08333	2.07123	N
2010-06-26	00:03:00	2010-06-26	06:45:00	27.1	0.279167	33.7433	34	6.7	4.04478	N
2018-08-03	15:40	2018-08-03	16:55	11.7	0.0520833	33.6816	34	1.25	9.36	N
2012-08-15	05:30	2012-08-15	07:15	1.2	0.0729167	33.6669	34	1.75	0.685714	N
2008-07-27	15:23:00	2008-07-27	16:53:00	14.1	0.0625	33.6645	34	1.5	9.4	N
2019-09-03	14:15	2019-09-03	15:00	1.3	0.03125	33.6018	34	0.75	1.73333	N
2008-07-21	23:46:00	2008-07-22	10:12:00	27.7	0.434722	33.4733	33	10.4333	2.65495	Y
2015-07-03	22:50	2015-07-04	06:40	4.1	0.326389	33.3433	33	7.83333	0.523404	N
2018-07-15	18:10	2018-07-15	18:40	1.2	0.0208333	33.2177	33	0.5	2.4	N
2019-09-03	18:10	2019-09-03	18:30	1.4	0.0138889	33.2164	33	0.333333	4.2	N
2015-08-10	14:10	2015-08-10	14:25	0.6	0.0104167	33.1925	33	0.25	2.4	N
2013-08-17	06:40:00	2013-08-17	07:25:00	2.6	0.03125	33.0997	33	0.75	3.46667	N
2015-07-17	08:55	2015-07-17	09:00	0.2	0.00347222	33.0894	33	0.0833333	2.4	N
2014-06-29	09:00	2014-06-29	15:20	7.5	0.263889	33.0641	33	6.33333	1.18421	N
2013-08-16	04:30:00	2013-08-16	05:25:00	6.6	0.0381944	33.0616	33	0.916667	7.2	N
2016-05-26	11:30	2016-05-26	13:40	2.4	0.0902778	32.9991	33	2.16667	1.10769	N
2019-07-13	05:05	2019-07-13	06:50	7.5	0.0729167	32.9482	33	1.75	4.28571	N
2015-07-18	00:10	2015-07-18	01:50	1.8	0.0694444	32.9253	33	1.66667	1.08	N
2012-08-15	18:45	2012-08-15	19:45	1	0.0416667	32.7239	33	1	1	N
2010-07-26	01:25:00	2010-07-26	12:08:00	17.6	0.446528	32.6924	33	10.7167	1.6423	N
2018-06-13	19:00	2018-06-15	04:20	36.8	1.38889	32.6623	33	33.3333	1.104	N
2020-08-13	23:05	2020-08-14	01:35	14.5	0.104167	32.5959	33	2.5	5.8	N
2010-07-18	11:17:00	2010-07-18	17:40:00	18.6	0.265972	32.5566	33	6.38333	2.91384	N
2012-07-22	09:20	2012-07-22	17:25	20.5	0.336806	32.5353	33	8.08333	2.53608	N
2010-07-17	23:24:00	2010-07-17	23:47:00	0.8	0.0159722	32.5253	33	0.383333	2.08696	N
2015-07-04	20:00	2015-07-05	05:45	3.9	0.40625	32.5216	33	9.75	0.4	N
2017-06-18	22:35	2017-06-19	04:25	23.6	0.243056	32.5032	33	5.83333	4.04571	N
2014-06-23	03:25	2014-06-23	03:55	0.3	0.0208333	32.4861	32	0.5	0.6	N
2017-06-26	07:20	2017-06-26	09:35	1.9	0.09375	32.4451	32	2.25	0.844444	N
2018-07-12	16:50	2018-07-12	17:05	1.8	0.0104167	32.4431	32	0.25	7.2	N
2017-07-16	14:30	2017-07-16	14:35	0.6	0.00347222	32.4188	32	0.0833333	7.2	N
2010-07-18	05:54:00	2010-07-18	06:02:00	0.3	0.00555556	32.3832	32	0.133333	2.25	N
2013-08-18	07:20:00	2013-08-18	09:15:00	8	0.0798611	32.3423	32	1.91667	4.17391	N
2008-07-26	12:36:00	2008-07-26	13:29:00	6	0.0368056	32.3157	32	0.883333	6.79245	N
2018-08-17	11:20	2018-08-17	15:35	12.5	0.177083	32.2853	32	4.25	2.94118	N
2010-08-05	18:43:00	2010-08-05	18:52:00	1.4	0.00625	32.2836	32	0.15	9.33333	N
2012-08-06	23:50	2012-08-07	04:15	4.7	0.184028	32.2661	32	4.41667	1.06415	N
2018-07-12	22:10	2018-07-13	05:05	21.9	0.288194	32.1873	32	6.91667	3.16627	N
2018-07-11	23:45	2018-07-12	00:35	3	0.0347222	32.13	32	0.833333	3.6	N
2016-08-19	16:55	2016-08-19	17:00	0.3	0.00347222	32.0294	32	0.0833333	3.6	N
2015-07-18	04:50	2015-07-18	04:55	0.2	0.00347222	31.9197	32	0.0833333	2.4	N
2017-06-29	02:10	2017-06-29	05:25	16.1	0.135417	31.9171	32	3.25	4.95385	N
2013-10-02	14:35:00	2013-10-02	17:50:00	3.3	0.135417	31.8984	32	3.25	1.01538	N
2019-07-03	21:55	2019-07-03	23:25	5.2	0.0625	31.807	32	1.5	3.46667	N
2010-08-05	13:14:00	2010-08-05	13:20:00	1.3	0.00416667	31.8057	32	0.1	13	N
2019-07-15	03:50	2019-07-15	06:05	2.3	0.09375	31.7432	32	2.25	1.02222	N
2019-07-04	20:45	2019-07-04	20:50	0.1	0.00347222	31.7008	32	0.0833333	1.2	N
2018-07-25	12:40	2018-07-25	13:20	0.7	0.0277778	31.6403	32	0.666667	1.05	N
2018-06-12	18:50	2018-06-13	02:10	6	0.305556	31.6095	32	7.33333	0.818182	N
2018-07-30	02:55	2018-07-30	03:00	0.3	0.00347222	31.4735	31	0.0833333	3.6	N
2019-07-04	23:50	2019-07-05	04:15	1.5	0.184028	31.3816	31	4.41667	0.339623	N
2008-08-03	00:29:00	2008-08-03	07:44:00	22.8	0.302083	31.3447	31	7.25	3.14483	Y
2010-08-01	19:50:00	2010-08-01	20:40:00	14.1	0.0347222	31.2721	31	0.833333	16.92	N
2013-10-03	08:20:00	2013-10-03	08:35:00	0.8	0.0104167	31.2209	31	0.25	3.2	N
2006-08-25	17:19:00	2006-08-25	17:23:00	0.6	0.00277778	31.1379	31	0.0666667	9	N
2014-07-02	02:30	2014-07-02	10:25	20	0.329861	31.0654	31	7.91667	2.52632	N
2016-09-09	23:20	2016-09-10	08:55	15	0.399306	31.0646	31	9.58333	1.56522	N
2017-07-15	00:45	2017-07-15	03:10	7.8	0.100694	31.0466	31	2.41667	3.22759	N
2017-07-14	16:45	2017-07-14	18:15	1.4	0.0625	31.0302	31	1.5	0.933333	N
2015-07-18	07:45	2015-07-18	10:25	0.8	0.111111	30.9565	31	2.66667	0.3	N
2006-08-21	04:51:00	2006-08-21	07:08:00	5.5	0.0951389	30.8793	31	2.28333	2.40876	N
2016-08-19	20:10	2016-08-20	12:55	17.2	0.697917	30.8215	31	16.75	1.02687	N
2014-08-11	14:20	2014-08-11	17:25	10.7	0.128472	30.7365	31	3.08333	3.47027	N
2018-07-25	08:35	2018-07-25	08:55	0.5	0.0138889	30.731	31	0.333333	1.5	N
2018-07-25	16:30	2018-07-25	23:05	8	0.274306	30.718	31	6.58333	1.21519	N
2018-08-17	03:35	2018-08-17	06:00	2.9	0.100694	30.5537	31	2.41667	1.2	N
2010-07-17	19:17:00	2010-07-17	20:17:00	4.6	0.0416667	30.3851	30	1	4.6	Y
2013-08-13	04:50:00	2013-08-13	05:10:00	0.6	0.0138889	30.362	30	0.333333	1.8	N
2007-09-17	08:10:00	2007-09-17	17:33:00	22.9	0.390972	30.1531	30	9.38333	2.4405	Y
2016-06-15	08:00	2016-06-15	16:55	32.7	0.371528	30.1454	30	8.91667	3.66729	N
2014-07-27	17:40	2014-07-27	18:25	13.8	0.03125	30.1402	30	0.75	18.4	N
2010-07-21	20:16:00	2010-07-21	20:43:00	6.9	0.01875	30.1302	30	0.45	15.3333	N
2020-09-11	00:40	2020-09-11	09:05	11.2	0.350694	30.1097	30	8.41667	1.33069	N
2020-08-16	23:55	2020-08-17	07:05	20.5	0.298611	29.9806	30	7.16667	2.86047	N
2008-07-11	17:09:00	2008-07-11	19:34:00	2.5	0.100694	29.9671	30	2.41667	1.03448	N
2018-06-12	02:45	2018-06-12	05:45	5	0.125	29.8836	30	3	1.66667	N
2020-09-13	04:50	2020-09-13	16:35	11.8	0.489583	29.841	30	11.75	1.00426	N
2015-06-25	13:45	2015-06-25	13:55	0.4	0.00694444	29.7973	30	0.166667	2.4	N
2020-07-19	03:50	2020-07-19	09:30	9.5	0.236111	29.7793	30	5.66667	1.67647	N
2009-07-29	22:31:00	2009-07-30	00:56:00	0.6	0.100694	29.7285	30	2.41667	0.248276	N
2015-08-09	03:30	2015-08-09	18:10	12.4	0.611111	29.6177	30	14.6667	0.845455	N
2013-06-23	12:00:00	2013-06-23	15:20:00	9.6	0.138889	29.5849	30	3.33333	2.88	N
2019-07-05	17:05	2019-07-05	17:20	0.5	0.0104167	29.3617	29	0.25	2	N	prob=5.6%
2020-09-17	00:45	2020-09-17	02:45	30.9	0.0833333	29.325	29	2	15.45	Y
2013-07-06	02:05:00	2013-07-06	04:15:00	5.1	0.0902778	29.3243	29	2.16667	2.35385	N
2017-06-26	00:00	2017-06-26	04:00	7.3	0.166667	29.3002	29	4	1.825	N
2019-07-06	01:20	2019-07-06	01:25	0.4	0.00347222	29.1621	29	0.0833333	4.8	N
2018-06-22	10:55	2018-06-22	11:15	0.3	0.0138889	29.13	29	0.333333	0.9	N
2010-08-04	18:57:00	2010-08-04	20:17:00	6.7	0.0555556	29.0633	29	1.33333	5.025	Y
2019-07-06	23:55	2019-07-07	03:55	11.2	0.166667	29.0229	29	4	2.8	N
2013-06-22	21:35:00	2013-06-22	22:10:00	0.8	0.0243056	29.0221	29	0.583333	1.37143	N
2008-07-31	18:51:00	2008-08-01	01:47:00	15.1	0.288889	28.9988	29	6.93333	2.17788	Y
2016-08-12	22:05	2016-08-12	22:25	2.2	0.0138889	28.978	29	0.333333	6.6	N
2010-07-25	10:47:00	2010-07-25	13:59:00	8.8	0.133333	28.939	29	3.2	2.75	N
2018-07-29	18:10	2018-07-29	18:50	4.4	0.0277778	28.8729	29	0.666667	6.6	N
2010-07-10	06:28:00	2010-07-10	16:29:00	11.9	0.417361	28.8482	29	10.0167	1.18802	N
2017-06-25	18:35	2017-06-25	18:50	0.4	0.0104167	28.8301	29	0.25	1.6	N
2009-06-26	19:47:00	2009-06-27	02:38:00	23	0.285417	28.812	29	6.85	3.35766	N
2014-06-28	01:05	2014-06-28	01:35	1.7	0.0208333	28.8052	29	0.5	3.4	N
2012-08-09	19:15	2012-08-09	19:30	3.9	0.0104167	28.7558	29	0.25	15.6	N
2013-10-04	04:25:00	2013-10-04	10:10:00	4.8	0.239583	28.7338	29	5.75	0.834783	N
2006-08-23	15:51:00	2006-08-23	21:04:00	17.5	0.217361	28.644	29	5.21667	3.35463	N
2020-09-26	02:45	2020-09-26	05:25	1.3	0.111111	28.6185	29	2.66667	0.4875	N
2015-06-20	02:00	2015-06-20	02:40	1.5	0.0277778	28.5888	29	0.666667	2.25	N
2016-09-20	04:25	2016-09-20	19:55	13.3	0.645833	28.5552	29	15.5	0.858065	N
2017-07-22	01:50	2017-07-22	02:05	0.6	0.0104167	28.5452	29	0.25	2.4	N
2009-08-12	14:16:00	2009-08-12	15:06:00	2.7	0.0347222	28.5309	29	0.833333	3.24	N
2016-08-22	21:45	2016-08-22	23:15	3.5	0.0625	28.5048	29	1.5	2.33333	N
2012-06-21	20:35	2012-06-22	12:35	74	0.666667	28.4306	28	16	4.625	N
2010-08-06	17:07:00	2010-08-06	17:15:00	0.9	0.00555556	28.3915	28	0.133333	6.75	N
2017-06-16	12:00	2017-06-16	13:10	1.4	0.0486111	28.386	28	1.16667	1.2	N
2018-06-11	04:10	2018-06-11	09:15	2.6	0.211806	28.3704	28	5.08333	0.511475	N
2016-08-14	05:45	2016-08-14	06:40	10.6	0.0381944	28.3536	28	0.916667	11.5636	N
2014-06-23	23:20	2014-06-24	07:10	31	0.326389	28.3243	28	7.83333	3.95745	Y
2015-09-08	16:10	2015-09-08	20:15	4.9	0.170139	28.3195	28	4.08333	1.2	N
2018-07-30	23:30	2018-07-31	03:35	3.7	0.170139	28.2376	28	4.08333	0.906122	N
2013-06-23	04:40:00	2013-06-23	04:50:00	1.4	0.00694444	28.162	28	0.166667	8.4	N
2020-05-23	03:45	2020-05-23	07:30	2.2	0.15625	28.1419	28	3.75	0.586667	N
2012-08-09	04:00	2012-08-09	04:10	0.4	0.00694444	28.1226	28	0.166667	2.4	N
2019-09-02	03:55	2019-09-02	05:00	0.8	0.0451389	28.0839	28	1.08333	0.738462	N
2007-06-10	14:29:00	2007-06-10	15:02:00	0.7	0.0229167	28.0281	28	0.55	1.27273	N
2009-08-13	05:16:00	2009-08-13	12:57:00	4.7	0.320139	28.0236	28	7.68333	0.611714	N
2018-06-11	21:10	2018-06-11	22:20	2.2	0.0486111	27.9805	28	1.16667	1.88571	N
2016-07-04	20:45	2016-07-04	20:55	0.2	0.00694444	27.9746	28	0.166667	1.2	N
2017-09-03	04:40	2017-09-03	05:25	2.9	0.03125	27.936	28	0.75	3.86667	N
2018-06-11	12:45	2018-06-11	14:50	0.5	0.0868056	27.9111	28	2.08333	0.24	N
2014-06-28	08:35	2014-06-28	14:10	8.2	0.232639	27.8747	28	5.58333	1.46866	N
2019-09-02	16:40	2019-09-02	17:40	1.1	0.0416667	27.8595	28	1	1.1	N
2014-08-07	23:50	2014-08-08	00:10	1.4	0.0138889	27.8118	28	0.333333	4.2	N
2010-09-29	16:06:00	2010-09-29	16:40:00	0.9	0.0236111	27.7963	28	0.566667	1.58824	N
2009-08-12	08:14:00	2009-08-12	09:41:00	0.2	0.0604167	27.7768	28	1.45	0.137931	N
2019-07-06	10:10	2019-07-06	14:55	3.7	0.197917	27.6164	28	4.75	0.778947	N
2020-08-16	16:15	2020-08-16	16:50	3.3	0.0243056	27.5362	28	0.583333	5.65714	N
2019-07-08	23:30	2019-07-09	05:05	25.7	0.232639	27.4999	27	5.58333	4.60299	N
2009-06-26	14:23:00	2009-06-26	14:33:00	0.8	0.00694444	27.468	27	0.166667	4.8	N
2016-08-22	17:40	2016-08-22	17:55	3.2	0.0104167	27.4031	27	0.25	12.8	N
2018-07-29	12:30	2018-07-29	13:30	3.7	0.0416667	27.4016	27	1	3.7	N
2019-09-03	01:05	2019-09-03	04:00	8.7	0.121528	27.3949	27	2.91667	2.98286	N
2007-08-08	00:09:00	2007-08-08	02:11:00	1.4	0.0847222	27.3769	27	2.03333	0.688525	N
2020-05-24	01:15	2020-05-24	04:00	4.9	0.114583	27.3528	27	2.75	1.78182	N
2020-05-30	22:40	2020-05-30	22:50	0.9	0.00694444	27.3441	27	0.166667	5.4	N
2007-06-11	20:49:00	2007-06-11	21:34:00	2.7	0.03125	27.3288	27	0.75	3.6	N
2012-06-20	19:05	2012-06-20	22:50	6	0.15625	27.3099	27	3.75	1.6	N
2013-08-12	13:25:00	2013-08-12	18:00:00	6.4	0.190972	27.2282	27	4.58333	1.39636	N
2020-05-19	04:00	2020-05-19	04:40	5.1	0.0277778	27.2179	27	0.666667	7.65	N
2018-07-29	00:10	2018-07-29	00:30	1.4	0.0138889	27.2056	27	0.333333	4.2	N
2007-06-12	02:50:00	2007-06-12	11:30:00	5.2	0.361111	27.1594	27	8.66667	0.6	N
2019-09-05	13:25	2019-09-05	13:30	0.1	0.00347222	27.1078	27	0.0833333	1.2	N
2008-07-31	14:48:00	2008-07-31	15:09:00	4.2	0.0145833	27.0666	27	0.35	12	N
2013-06-25	07:30:00	2013-06-25	13:05:00	5.9	0.232639	27.0499	27	5.58333	1.05672	N
2018-08-03	08:35	2018-08-03	11:55	8.4	0.138889	26.9834	27	3.33333	2.52	N
2016-06-29	15:50	2016-06-29	16:40	1.4	0.0347222	26.9553	27	0.833333	1.68	N
2012-08-09	13:45	2012-08-09	14:00	4.4	0.0104167	26.9249	27	0.25	17.6	N
2015-07-19	09:35	2015-07-19	12:55	0.9	0.138889	26.9115	27	3.33333	0.27	N
2016-09-19	14:45	2016-09-19	18:30	2.1	0.15625	26.8677	27	3.75	0.56	N
2019-09-01	16:40	2019-09-01	18:15	4	0.0659722	26.7661	27	1.58333	2.52632	N
2015-06-13	09:55	2015-06-13	10:20	0.8	0.0173611	26.7545	27	0.416667	1.92	N
2017-09-04	03:15	2017-09-04	04:00	2	0.03125	26.7415	27	0.75	2.66667	N
2007-06-11	00:35:00	2007-06-11	01:29:00	1.9	0.0375	26.6924	27	0.9	2.11111	N
2015-09-06	15:25	2015-09-07	01:30	12	0.420139	26.6734	27	10.0833	1.19008	N
2019-09-05	08:15	2019-09-05	08:20	0.1	0.00347222	26.5941	27	0.0833333	1.2	N
2018-08-03	04:20	2018-08-03	04:25	0.1	0.00347222	26.5647	27	0.0833333	1.2	N
2013-09-04	05:20:00	2013-09-04	09:55:00	1.6	0.190972	26.4698	26	4.58333	0.349091	N
2016-07-05	02:20	2016-07-05	02:40	4.5	0.0138889	26.4618	26	0.333333	13.5	N
2006-07-11	14:29:00	2006-07-11	14:59:00	2.2	0.0208333	26.4325	26	0.5	4.4	N
2015-07-23	00:30	2015-07-23	04:20	7.1	0.159722	26.4029	26	3.83333	1.85217	N
2006-08-23	01:35:00	2006-08-23	09:00:00	3.4	0.309028	26.3916	26	7.41667	0.458427	N
2013-09-04	00:50:00	2013-09-04	02:20:00	0.7	0.0625	26.3071	26	1.5	0.466667	N
2014-08-04	12:15	2014-08-04	12:40	0.7	0.0173611	26.2945	26	0.416667	1.68	N
2008-08-17	12:39:00	2008-08-17	16:24:00	12.1	0.15625	26.2878	26	3.75	3.22667	Y
2007-07-18	22:02:00	2007-07-19	10:59:00	24.3	0.539583	26.282	26	12.95	1.87645	N
2008-06-10	19:57:00	2008-06-10	20:11:00	1.4	0.00972222	26.2741	26	0.233333	6	N
2016-08-05	16:50	2016-08-05	19:05	14.1	0.09375	26.2737	26	2.25	6.26667	N
2010-07-24	19:13:00	2010-07-24	20:46:00	5.6	0.0645833	26.2704	26	1.55	3.6129	Y
2010-07-14	05:28:00	2010-07-14	05:32:00	0.2	0.00277778	26.1981	26	0.0666667	3	N
2013-08-08	15:25:00	2013-08-08	15:30:00	0.4	0.00347222	26.1369	26	0.0833333	4.8	N
2018-06-23	15:55	2018-06-24	00:00	46.3	0.336806	26.0688	26	8.08333	5.72784	N
2020-07-12	12:40	2020-07-12	19:00	15.8	0.263889	26.0186	26	6.33333	2.49474	N
2016-08-14	00:00	2016-08-14	02:30	2.8	0.104167	26.0134	26	2.5	1.12	N
2015-06-10	17:45	2015-06-10	22:30	16.9	0.197917	25.988	26	4.75	3.55789	N
2015-07-24	16:55	2015-07-24	19:10	0.7	0.09375	25.9708	26	2.25	0.311111	N
2013-06-26	20:25:00	2013-06-26	20:45:00	2.2	0.0138889	25.9463	26	0.333333	6.6	N
2014-08-02	15:45	2014-08-02	19:40	10.8	0.163194	25.9449	26	3.91667	2.75745	N
2016-06-28	20:20	2016-06-28	22:25	1.6	0.0868056	25.7161	26	2.08333	0.768	N
2015-08-13	19:45	2015-08-13	19:55	0.5	0.00694444	25.6091	26	0.166667	3	N
2015-06-09	20:50	2015-06-09	21:25	5.2	0.0243056	25.4741	25	0.583333	8.91429	N
2018-07-25	01:00	2018-07-25	02:50	5.9	0.0763889	25.4158	25	1.83333	3.21818	N
2008-06-11	07:08:00	2008-06-11	15:51:00	52	0.363194	25.3922	25	8.71667	5.96558	N
2013-08-24	22:45:00	2013-08-25	22:20:00	54.7	0.982639	25.3597	25	23.5833	2.31943	N
2013-10-06	03:25:00	2013-10-06	07:25:00	7	0.166667	25.3594	25	4	1.75	N
2019-08-28	13:30	2019-08-28	17:50	2.7	0.180556	25.3246	25	4.33333	0.623077	N
2006-06-10	03:34:00	2006-06-10	04:29:00	0.3	0.0381944	25.2187	25	0.916667	0.327273	N
2016-09-06	20:35	2016-09-07	12:55	25.2	0.680556	25.2123	25	16.3333	1.54286	N
2015-06-21	04:45	2015-06-21	08:30	33.8	0.15625	25.1455	25	3.75	9.01333	N
2013-09-04	23:30:00	2013-09-05	04:35:00	1.4	0.211806	25.105	25	5.08333	0.27541	N
2009-08-11	22:05:00	2009-08-12	00:25:00	6.6	0.0972222	24.9718	25	2.33333	2.82857	N
2017-06-18	00:35	2017-06-18	03:25	11.8	0.118056	24.9099	25	2.83333	4.16471	N
2016-06-29	04:40	2016-06-29	06:30	3.3	0.0763889	24.8887	25	1.83333	1.8	N
2010-07-13	19:24:00	2010-07-13	21:19:00	2.6	0.0798611	24.8154	25	1.91667	1.35652	N
2020-05-25	14:50	2020-05-27	06:20	24	1.64583	24.7801	25	39.5	0.607595	N
2015-07-20	13:55	2015-07-20	14:00	0.1	0.00347222	24.775	25	0.0833333	1.2	N
2014-06-20	05:55	2014-06-20	12:45	24.1	0.284722	24.7239	25	6.83333	3.52683	N
2018-08-16	09:45	2018-08-16	09:55	0.5	0.00694444	24.6784	25	0.166667	3	N
2006-06-09	18:43:00	2006-06-09	18:54:00	0.2	0.00763889	24.6717	25	0.183333	1.09091	N
2006-08-20	22:17:00	2006-08-21	01:26:00	7.3	0.13125	24.6295	25	3.15	2.31746	Y
2018-08-01	16:00	2018-08-01	16:45	10.6	0.03125	24.5027	25	0.75	14.1333	N
2013-06-06	03:15:00	2013-06-06	04:05:00	1.7	0.0347222	24.479	24	0.833333	2.04	N	prob=7/127=5.5%
2006-08-14	16:42:00	2006-08-14	16:57:00	0.4	0.0104167	24.45	24	0.25	1.6	N
2007-08-07	19:10:00	2007-08-07	19:24:00	3.1	0.00972222	24.4455	24	0.233333	13.2857	N
2017-06-25	00:00	2017-06-25	10:05	8.4	0.420139	24.3811	24	10.0833	0.833058	N
2007-07-18	03:11:00	2007-07-18	03:26:00	2.4	0.0104167	24.3299	24	0.25	9.6	N
2016-07-06	22:00	2016-07-06	22:05	0.1	0.00347222	24.3207	24	0.0833333	1.2	N
2019-08-29	02:40	2019-08-29	03:15	9.4	0.0243056	24.2577	24	0.583333	16.1143	N
2013-09-05	11:20:00	2013-09-06	04:15:00	10.2	0.704861	24.2287	24	16.9167	0.602956	N
2007-06-09	23:53:00	2007-06-10	05:38:00	4.7	0.239583	24.193	24	5.75	0.817391	N
2013-05-11	00:40:00	2013-05-11	04:25:00	2.7	0.15625	24.1141	24	3.75	0.72	N
2015-07-20	07:50	2015-07-20	10:05	1.5	0.09375	24.0343	24	2.25	0.666667	N
2014-08-04	18:50	2014-08-04	20:00	15.5	0.0486111	24.0184	24	1.16667	13.2857	N
2020-05-22	01:55	2020-05-22	09:35	8.8	0.319444	23.9317	24	7.66667	1.14783	N
2016-10-31	02:35	2016-10-31	02:45	0.4	0.00694444	23.8692	24	0.166667	2.4	N
2019-06-29	02:00	2019-06-29	03:35	21.4	0.0659722	23.7561	24	1.58333	13.5158	N
2012-08-21	03:10	2012-08-21	07:05	10.3	0.163194	23.7477	24	3.91667	2.62979	N
2006-07-18	02:07:00	2006-07-18	10:26:00	21.5	0.346528	23.575	24	8.31667	2.58517	N
2007-07-18	09:27:00	2007-07-18	12:59:00	2.6	0.147222	23.4991	23	3.53333	0.735849	N
2018-08-16	16:50	2018-08-16	22:20	9.6	0.229167	23.4857	23	5.5	1.74545	N
2019-09-16	01:55	2019-09-16	05:15	3.5	0.138889	23.4857	23	3.33333	1.05	N
2008-06-23	04:57:00	2008-06-23	11:06:00	13.1	0.25625	23.3748	23	6.15	2.13008	N
2019-08-31	16:20	2019-08-31	19:05	8.6	0.114583	23.3738	23	2.75	3.12727	N
2013-05-12	00:45:00	2013-05-12	03:15:00	1	0.104167	23.3404	23	2.5	0.4	N
2019-08-13	18:20	2019-08-13	18:25	0.5	0.00347222	23.321	23	0.0833333	6	N
2013-06-07	02:10:00	2013-06-07	07:25:00	54.3	0.21875	23.2701	23	5.25	10.3429	Y
2008-07-01	11:00:00	2008-07-01	20:53:00	25.7	0.411806	23.2153	23	9.88333	2.60034	Y
2015-08-19	13:35	2015-08-19	16:55	3.5	0.138889	23.1955	23	3.33333	1.05	N
2015-05-22	22:00	2015-05-23	03:40	3.6	0.236111	23.0547	23	5.66667	0.635294	N
2006-07-12	15:09:00	2006-07-12	16:56:00	2.9	0.0743056	23.0392	23	1.78333	1.62617	N
2007-08-13	09:22:00	2007-08-13	11:04:00	2.2	0.0708333	22.9525	23	1.7	1.29412	N
2020-09-22	21:35	2020-09-23	07:55	26.3	0.430556	22.8521	23	10.3333	2.54516	N
2017-07-29	14:40	2017-07-29	15:45	4.4	0.0451389	22.8021	23	1.08333	4.06154	N
2009-08-10	21:51:00	2009-08-11	01:19:00	8.4	0.144444	22.7843	23	3.46667	2.42308	N
2007-09-10	17:11:00	2007-09-11	04:45:00	4.8	0.481944	22.7328	23	11.5667	0.414986	N
2020-09-22	07:05	2020-09-22	07:30	0.5	0.0173611	22.6893	23	0.416667	1.2	N
2019-08-31	12:35	2019-08-31	13:00	1.3	0.0173611	22.6815	23	0.416667	3.12	N
2014-08-02	09:15	2014-08-02	11:35	5.5	0.0972222	22.6708	23	2.33333	2.35714	N
2006-09-10	20:51:00	2006-09-11	01:36:00	2.2	0.197917	22.649	23	4.75	0.463158	N
2014-08-01	18:20	2014-08-01	19:20	0.4	0.0416667	22.6041	23	1	0.4	N
2015-08-19	03:00	2015-08-19	03:55	2.2	0.0381944	22.5392	23	0.916667	2.4	N
2016-05-21	17:15	2016-05-21	19:55	1.5	0.111111	22.5385	23	2.66667	0.5625	N
2013-08-10	03:30:00	2013-08-10	03:35:00	0.4	0.00347222	22.5374	23	0.0833333	4.8	N
2019-08-14	01:55	2019-08-14	02:20	2.7	0.0173611	22.519	23	0.416667	6.48	N
2009-08-10	17:16:00	2009-08-10	17:30:00	0.2	0.00972222	22.4721	22	0.233333	0.857143	N
2020-07-17	14:25	2020-07-17	19:15	16.3	0.201389	22.4675	22	4.83333	3.37241	N
2018-09-29	08:10	2018-09-29	08:15	0.1	0.00347222	22.4427	22	0.0833333	1.2	N
2007-08-13	01:43:00	2007-08-13	03:10:00	0.8	0.0604167	22.4102	22	1.45	0.551724	N
2010-07-06	00:41:00	2010-07-06	11:34:00	45.5	0.453472	22.3763	22	10.8833	4.1807	Y
2019-08-14	14:20	2019-08-14	15:30	3.1	0.0486111	22.3673	22	1.16667	2.65714	N
2013-08-09	16:35:00	2013-08-09	16:45:00	1.6	0.00694444	22.3505	22	0.166667	9.6	N
2006-07-13	16:29:00	2006-07-13	16:47:00	0.3	0.0125	22.3237	22	0.3	1	N
2017-09-10	08:00	2017-09-10	09:45	2.1	0.0729167	22.3109	22	1.75	1.2	N
2018-06-02	08:40	2018-06-02	09:50	1.6	0.0486111	22.2538	22	1.16667	1.37143	N
2007-07-10	07:47:00	2007-07-10	08:58:00	4.1	0.0493056	22.2113	22	1.18333	3.46479	N
2016-10-30	05:40	2016-10-30	11:35	5.1	0.246528	22.1289	22	5.91667	0.861972	N
2020-07-08	19:25	2020-07-09	07:25	24.6	0.5	22.078	22	12	2.05	N
2007-08-12	14:33:00	2007-08-12	16:03:00	1	0.0625	22.0692	22	1.5	0.666667	N
2018-07-24	19:20	2018-07-24	20:50	3.8	0.0625	22.0089	22	1.5	2.53333	N
2010-09-14	23:57:00	2010-09-15	02:28:00	1.7	0.104861	21.9634	22	2.51667	0.675497	N
2006-07-22	18:44:00	2006-07-22	18:53:00	1	0.00625	21.9521	22	0.15	6.66667	N
2006-06-09	08:01:00	2006-06-09	10:27:00	3.8	0.101389	21.9479	22	2.43333	1.56164	N
2016-06-30	23:45	2016-07-01	07:45	33.6	0.333333	21.9103	22	8	4.2	N
2013-08-10	14:15:00	2013-08-10	14:30:00	2.9	0.0104167	21.8969	22	0.25	11.6	N
2020-07-17	08:30	2020-07-17	11:00	1.5	0.104167	21.888	22	2.5	0.6	N
2015-08-18	23:45	2015-08-19	00:00	0.6	0.0104167	21.8461	22	0.25	2.4	N
2016-05-22	02:45	2016-05-22	16:40	25.3	0.579861	21.8229	22	13.9167	1.81796	N
2012-09-02	08:55	2012-09-02	09:00	0.1	0.00347222	21.8183	22	0.0833333	1.2	N
2019-09-20	08:20	2019-09-20	09:50	3.2	0.0625	21.7876	22	1.5	2.13333	N
2018-06-01	22:30	2018-06-01	22:40	1.4	0.00694444	21.7151	22	0.166667	8.4	N
2015-08-26	04:40	2015-08-26	09:50	2.6	0.215278	21.6705	22	5.16667	0.503226	N
2014-08-23	22:25	2014-08-24	04:25	7.7	0.25	21.6389	22	6	1.28333	N
2020-05-21	18:40	2020-05-21	18:55	3.6	0.0104167	21.6312	22	0.25	14.4	N
2015-10-09	16:25	2015-10-10	10:35	14.9	0.756944	21.5629	22	18.1667	0.820183	N
2009-07-27	01:43:00	2009-07-27	15:27:00	27.8	0.572222	21.5602	22	13.7333	2.02427	N
2015-08-14	17:15	2015-08-14	17:35	3.8	0.0138889	21.5035	22	0.333333	11.4	N
2017-07-21	15:55	2017-07-21	18:35	9.1	0.111111	21.5004	22	2.66667	3.4125	N
2017-08-06	15:00	2017-08-06	15:40	1.8	0.0277778	21.4902	21	0.666667	2.7	N
2010-07-05	18:01:00	2010-07-05	18:04:00	0.5	0.00208333	21.4354	21	0.05	10	N
2013-05-26	02:40:00	2013-05-26	02:45:00	1.3	0.00347222	21.3818	21	0.0833333	15.6	N
2008-07-11	06:19:00	2008-07-11	08:10:00	11.9	0.0770833	21.3271	21	1.85	6.43243	Y
2017-08-04	18:35	2017-08-04	23:00	8	0.184028	21.2705	21	4.41667	1.81132	N
2016-10-30	00:35	2016-10-30	01:00	0.6	0.0173611	21.1757	21	0.416667	1.44	N
2017-09-06	02:05	2017-09-06	16:30	37.9	0.600694	21.0563	21	14.4167	2.6289	N
2015-08-25	15:55	2015-08-25	17:05	0.7	0.0486111	21.018	21	1.16667	0.6	N
2017-07-23	13:30	2017-07-23	16:30	2.7	0.125	20.8062	21	3	0.9	N
2012-07-04	20:20	2012-07-04	21:05	0.2	0.03125	20.8038	21	0.75	0.266667	N
2007-09-02	14:35:00	2007-09-02	14:39:00	0.1	0.00277778	20.6949	21	0.0666667	1.5	N
2008-06-07	04:24:00	2008-06-07	06:12:00	2.1	0.075	20.6793	21	1.8	1.16667	N
2019-09-07	03:55	2019-09-07	04:25	0.8	0.0208333	20.6712	21	0.5	1.6	N
2006-08-15	17:47:00	2006-08-15	20:52:00	30.2	0.128472	20.6155	21	3.08333	9.79459	Y
2014-06-06	01:05	2014-06-06	12:40	64.1	0.482639	20.542	21	11.5833	5.53381	Y
2018-06-10	08:00	2018-06-10	09:35	10	0.0659722	20.5376	21	1.58333	6.31579	N
2006-07-05	00:34:00	2006-07-05	02:53:00	24.4	0.0965278	20.5223	21	2.31667	10.5324	Y
2019-06-25	04:45	2019-06-25	10:50	22	0.253472	20.5156	21	6.08333	3.61644	N
2015-08-13	14:30	2015-08-13	15:50	6.8	0.0555556	20.4567	20	1.33333	5.1	N
2012-08-18	09:05	2012-08-19	03:30	18.7	0.767361	20.427	20	18.4167	1.01538	N
2010-09-14	11:19:00	2010-09-14	11:46:00	1.3	0.01875	20.4256	20	0.45	2.88889	N
2013-05-25	13:40:00	2013-05-25	16:40:00	3.9	0.125	20.4179	20	3	1.3	N
2010-09-29	06:14:00	2010-09-29	07:04:00	8.9	0.0347222	20.3711	20	0.833333	10.68	N
2016-06-25	23:10	2016-06-26	06:25	25.1	0.302083	20.361	20	7.25	3.46207	N
2006-07-04	20:59:00	2006-07-04	21:03:00	0.1	0.00277778	20.3367	20	0.0666667	1.5	N
2007-06-15	04:04:00	2007-06-15	05:13:00	5.7	0.0479167	20.2289	20	1.15	4.95652	N
2020-06-25	14:55	2020-06-25	15:40	25.5	0.03125	20.1794	20	0.75	34	N
2017-07-21	01:30	2017-07-21	03:00	4.1	0.0625	20.1458	20	1.5	2.73333	N
2018-09-03	06:05	2018-09-03	07:20	3.7	0.0520833	20.1107	20	1.25	2.96	N
2012-07-04	05:35	2012-07-04	07:20	2.2	0.0729167	20.0815	20	1.75	1.25714	N
2010-09-27	00:20:00	2010-09-27	07:56:00	9.7	0.316667	20.0473	20	7.6	1.27632	N
2014-08-01	10:35	2014-08-01	15:05	5.5	0.1875	20.043	20	4.5	1.22222	N
2015-08-01	01:25	2015-08-01	05:35	4.6	0.173611	20.0173	20	4.16667	1.104	N
2019-07-03	13:55	2019-07-03	17:30	13.8	0.149306	19.9947	20	3.58333	3.85116	N
2010-09-16	02:09:00	2010-09-16	02:11:00	0.1	0.00138889	19.9748	20	0.0333333	3	N
2017-10-13	04:10	2017-10-13	04:15	0.1	0.00347222	19.9526	20	0.0833333	1.2	N
2018-09-30	09:55	2018-10-01	21:20	44	1.47569	19.9507	20	35.4167	1.24235	N
2018-06-05	05:30	2018-06-05	05:45	0.6	0.0104167	19.8862	20	0.25	2.4	N
2013-08-15	20:00:00	2013-08-15	22:50:00	16.8	0.118056	19.8387	20	2.83333	5.92941	N
2013-06-04	11:30:00	2013-06-04	13:10:00	0.7	0.0694444	19.8288	20	1.66667	0.42	N
2013-06-05	01:45:00	2013-06-05	04:20:00	10.1	0.107639	19.757	20	2.58333	3.90968	N
2013-09-02	22:40:00	2013-09-03	19:00:00	13	0.847222	19.7322	20	20.3333	0.639344	N
2014-08-10	00:55	2014-08-10	06:20	20.1	0.225694	19.7315	20	5.41667	3.71077	N
2015-08-28	09:15	2015-08-28	12:25	1.2	0.131944	19.6982	20	3.16667	0.378947	N
2014-10-13	04:45	2014-10-13	08:10	1.4	0.142361	19.6239	20	3.41667	0.409756	N
2007-07-12	05:48:00	2007-07-12	08:19:00	47	0.104861	19.5889	20	2.51667	18.6755	N
2018-05-31	18:55	2018-05-31	22:10	7.4	0.135417	19.5773	20	3.25	2.27692	N
2008-07-15	17:48:00	2008-07-15	19:42:00	2.2	0.0791667	19.5701	20	1.9	1.15789	N
2016-09-04	18:35	2016-09-05	06:05	3.9	0.479167	19.5285	20	11.5	0.33913	N
2008-08-16	05:56:00	2008-08-16	12:45:00	13.8	0.284028	19.5062	20	6.81667	2.02445	N
2006-08-20	18:32:00	2006-08-20	19:08:00	6	0.025	19.5049	20	0.6	10	N
2013-05-25	08:20:00	2013-05-25	09:00:00	0.6	0.0277778	19.4192	19	0.666667	0.9	N	prob=1.8%
2018-08-21	13:55	2018-08-21	14:10	1.6	0.0104167	19.4191	19	0.25	6.4	N
2017-07-20	21:30	2017-07-20	21:40	0.7	0.00694444	19.3657	19	0.166667	4.2	N
2008-07-14	16:03:00	2008-07-14	16:46:00	4.2	0.0298611	19.2555	19	0.716667	5.86047	N
2019-06-14	06:40	2019-06-14	07:05	1.6	0.0173611	19.2353	19	0.416667	3.84	N
2019-09-18	01:55	2019-09-18	04:20	16.6	0.100694	19.1218	19	2.41667	6.86897	N
2014-06-16	01:55	2014-06-16	08:45	26.5	0.284722	19.0745	19	6.83333	3.87805	N
2014-09-29	20:50	2014-09-29	22:25	2.2	0.0659722	19.0454	19	1.58333	1.38947	N
2013-05-03	09:15:00	2013-05-03	10:25:00	0.7	0.0486111	18.9757	19	1.16667	0.6	N
2017-07-28	15:15	2017-07-28	15:55	8	0.0277778	18.9138	19	0.666667	12	N
2020-06-30	06:35	2020-06-30	15:15	29.3	0.361111	18.9041	19	8.66667	3.38077	N
2016-09-06	04:55	2016-09-06	13:10	9.3	0.34375	18.7959	19	8.25	1.12727	N
2012-07-05	16:10	2012-07-05	16:20	0.3	0.00694444	18.7634	19	0.166667	1.8	N
2012-08-14	18:30	2012-08-15	01:55	20.8	0.309028	18.7427	19	7.41667	2.80449	N
2017-08-03	14:25	2017-08-03	14:35	1.4	0.00694444	18.702	19	0.166667	8.4	N
2018-06-04	02:25	2018-06-04	07:25	4.7	0.208333	18.7015	19	5	0.94	N
2006-07-24	00:05:00	2006-07-24	09:53:00	19.4	0.408333	18.6532	19	9.8	1.97959	N
2012-08-14	15:15	2012-08-14	15:25	1.2	0.00694444	18.6311	19	0.166667	7.2	N
2007-09-03	07:41:00	2007-09-03	10:52:00	1.2	0.132639	18.6277	19	3.18333	0.376963	N
2016-09-19	07:50	2016-09-19	11:05	10.3	0.135417	18.6216	19	3.25	3.16923	N
2017-08-03	18:30	2017-08-04	01:35	6.7	0.295139	18.6206	19	7.08333	0.945882	N
2017-08-10	18:20	2017-08-10	21:05	0.9	0.114583	18.6098	19	2.75	0.327273	N
2013-07-21	03:25:00	2013-07-21	03:30:00	0.5	0.00347222	18.5951	19	0.0833333	6	N
2015-07-31	20:30	2015-07-31	21:15	1.5	0.03125	18.5692	19	0.75	2	N
2015-08-27	22:00	2015-08-28	00:20	3.2	0.0972222	18.4288	18	2.33333	1.37143	N
2015-08-05	15:10	2015-08-05	19:30	5.3	0.180556	18.3385	18	4.33333	1.22308	N
2015-07-22	18:00	2015-07-22	19:50	8.9	0.0763889	18.3186	18	1.83333	4.85455	N
2018-09-28	01:50	2018-09-28	08:10	8.7	0.263889	18.3073	18	6.33333	1.37368	N
2010-06-21	03:23:00	2010-06-21	10:41:00	1.8	0.304167	18.3022	18	7.3	0.246575	N
2013-08-12	01:15:00	2013-08-12	10:05:00	11.7	0.368056	18.3016	18	8.83333	1.32453	N
2018-05-31	13:30	2018-05-31	14:40	1.5	0.0486111	18.2248	18	1.16667	1.28571	N
2019-09-08	12:20	2019-09-08	14:50	1.4	0.104167	18.194	18	2.5	0.56	N
2019-09-09	02:00	2019-09-09	11:45	43.8	0.40625	18.1909	18	9.75	4.49231	N
2006-08-13	14:21:00	2006-08-13	18:00:00	12.9	0.152083	18.0652	18	3.65	3.53425	N
2017-10-14	12:45	2017-10-14	18:25	2.6	0.236111	17.949	18	5.66667	0.458824	N
2017-07-20	16:35	2017-07-20	16:45	1.4	0.00694444	17.8977	18	0.166667	8.4	N
2018-10-08	06:00	2018-10-08	06:55	1.9	0.0381944	17.844	18	0.916667	2.07273	N
2017-08-01	15:55	2017-08-01	20:10	7.3	0.177083	17.7507	18	4.25	1.71765	N
2018-08-22	14:25	2018-08-22	14:50	11.1	0.0173611	17.7465	18	0.416667	26.64	N
2020-08-10	13:10	2020-08-10	15:30	11.4	0.0972222	17.733	18	2.33333	4.88571	N
2017-09-21	06:35	2017-09-21	07:50	1	0.0520833	17.6989	18	1.25	0.8	N
2009-07-21	02:32:00	2009-07-21	03:45:00	7	0.0506944	17.6913	18	1.21667	5.75342	N
2020-08-13	10:15	2020-08-13	13:25	19.9	0.131944	17.6389	18	3.16667	6.28421	N
2014-08-29	16:45	2014-08-29	16:50	0.3	0.00347222	17.6376	18	0.0833333	3.6	N
2017-08-24	06:45	2017-08-25	16:35	83.7	1.40972	17.4615	17	33.8333	2.47389	N
2015-08-06	23:25	2015-08-07	01:25	2.6	0.0833333	17.2716	17	2	1.3	N
2013-05-25	01:25:00	2013-05-25	03:10:00	2.8	0.0729167	17.078	17	1.75	1.6	N
2017-08-08	11:40	2017-08-08	17:40	11.6	0.25	17.0376	17	6	1.93333	N
2008-06-09	01:03:00	2008-06-09	08:05:00	19.6	0.293056	16.8867	17	7.03333	2.78673	N
2009-07-20	15:21:00	2009-07-20	19:50:00	3.3	0.186806	16.8586	17	4.48333	0.736059	N
2013-07-30	17:15:00	2013-07-30	18:05:00	2.5	0.0347222	16.8503	17	0.833333	3	N
2006-07-17	12:10:00	2006-07-17	14:03:00	0.4	0.0784722	16.7919	17	1.88333	0.212389	N
2018-09-18	23:10	2018-09-19	05:25	9.3	0.260417	16.7683	17	6.25	1.488	N
2014-10-29	03:50	2014-10-29	04:05	0.4	0.0104167	16.747	17	0.25	1.6	N
2020-06-14	15:45	2020-06-14	15:55	0.3	0.00694444	16.7207	17	0.166667	1.8	N
2007-08-24	19:45:00	2007-08-26	00:21:00	50.6	1.19167	16.686	17	28.6	1.76923	N
2006-09-18	08:35:00	2006-09-18	13:03:00	13	0.186111	16.685	17	4.46667	2.91045	N
2014-10-12	23:35	2014-10-13	01:30	3.2	0.0798611	16.67	17	1.91667	1.66957	N
2017-07-25	17:20	2017-07-25	18:40	3.4	0.0555556	16.5689	17	1.33333	2.55	N
2010-06-23	04:56:00	2010-06-23	05:18:00	0.4	0.0152778	16.5609	17	0.366667	1.09091	N
2019-07-19	02:30	2019-07-19	12:50	66.8	0.430556	16.484	16	10.3333	6.46452	N
2013-05-04	22:00:00	2013-05-04	22:10:00	0.8	0.00694444	16.4343	16	0.166667	4.8	N
2015-08-08	03:25	2015-08-08	14:45	17.7	0.472222	16.4169	16	11.3333	1.56176	N
2016-09-15	23:30	2016-09-16	13:05	18.5	0.565972	16.4126	16	13.5833	1.36196	N
2019-09-25	16:40	2019-09-25	21:30	3.3	0.201389	16.2916	16	4.83333	0.682759	N
2017-09-22	04:15	2017-09-22	08:15	1.6	0.166667	16.2648	16	4	0.4	N
2006-07-17	20:58:00	2006-07-17	22:02:00	8.5	0.0444444	16.21	16	1.06667	7.96875	N
2017-05-17	02:55	2017-05-17	04:40	0.9	0.0729167	16.1844	16	1.75	0.514286	N
2010-07-16	21:45:00	2010-07-17	05:04:00	18.7	0.304861	16.1737	16	7.31667	2.55581	N
2019-09-27	19:00	2019-09-27	19:30	4.1	0.0208333	16.095	16	0.5	8.2	N
2014-08-26	20:10	2014-08-26	22:05	5.3	0.0798611	16.0194	16	1.91667	2.76522	N
2007-09-09	21:48:00	2007-09-10	11:32:00	9.8	0.572222	15.9925	16	13.7333	0.713592	N
2006-06-12	23:29:00	2006-06-12	23:37:00	0.5	0.00555556	15.9502	16	0.133333	3.75	N
2010-06-22	21:40:00	2010-06-23	00:03:00	1.1	0.0993056	15.9413	16	2.38333	0.461538	N
2018-09-26	05:35	2018-09-26	05:40	0.3	0.00347222	15.9312	16	0.0833333	3.6	N
2016-05-21	06:45	2016-05-21	12:30	7.2	0.239583	15.9159	16	5.75	1.25217	N
2018-07-24	13:30	2018-07-24	15:40	9.1	0.0902778	15.9139	16	2.16667	4.2	N
2017-07-20	11:05	2017-07-20	11:35	2.3	0.0208333	15.9133	16	0.5	4.6	N
2007-09-13	20:44:00	2007-09-14	12:53:00	39.9	0.672917	15.8216	16	16.15	2.47059	Y
2017-08-01	03:35	2017-08-01	04:05	3.2	0.0208333	15.7837	16	0.5	6.4	N
2006-07-31	18:18:00	2006-07-31	18:20:00	0.4	0.00138889	15.6737	16	0.0333333	12	N
2018-06-09	01:20	2018-06-09	07:10	10.4	0.243056	15.6276	16	5.83333	1.78286	N
2017-10-17	12:10	2017-10-17	12:40	0.4	0.0208333	15.6168	16	0.5	0.8	N
2019-09-27	03:15	2019-09-27	03:50	1.9	0.0243056	15.6007	16	0.583333	3.25714	N
2017-05-15	08:20	2017-05-15	09:20	1.3	0.0416667	15.5613	16	1	1.3	N
2015-08-31	22:45	2015-09-01	08:25	7.5	0.402778	15.5433	16	9.66667	0.775862	N
2018-06-22	02:55	2018-06-22	07:55	17	0.208333	15.4325	15	5	3.4	N
2007-08-22	23:28:00	2007-08-23	00:51:00	1.1	0.0576389	15.4201	15	1.38333	0.795181	N
2018-10-09	22:55	2018-10-10	05:00	2.5	0.253472	15.3806	15	6.08333	0.410959	N
2008-06-26	19:42:00	2008-06-27	05:04:00	19.1	0.390278	15.3804	15	9.36667	2.03915	N
2016-06-11	04:25	2016-06-11	19:45	33.1	0.638889	15.3119	15	15.3333	2.1587	N
2020-06-02	21:50	2020-06-02	21:55	0.5	0.00347222	15.2952	15	0.0833333	6	N
2018-08-25	20:20	2018-08-25	23:45	6.8	0.142361	15.2638	15	3.41667	1.99024	N
2006-07-15	20:27:00	2006-07-15	20:53:00	7.4	0.0180556	15.2243	15	0.433333	17.0769	N
2017-05-16	01:55	2017-05-16	05:30	2.5	0.149306	15.2114	15	3.58333	0.697674	N
2013-05-24	19:20:00	2013-05-24	20:30:00	4.1	0.0486111	15.2053	15	1.16667	3.51429	N
2012-08-13	17:00	2012-08-13	21:55	6.6	0.204861	15.1667	15	4.91667	1.34237	N
2018-07-20	15:55	2018-07-20	16:00	0.3	0.00347222	15.1559	15	0.0833333	3.6	N
2006-08-12	23:41:00	2006-08-13	01:20:00	4.2	0.06875	15.1186	15	1.65	2.54545	N
2006-08-29	17:50:00	2006-08-29	19:12:00	2.4	0.0569444	15.0815	15	1.36667	1.7561	N
2007-09-05	11:30:00	2007-09-05	23:51:00	6.3	0.514583	15.0641	15	12.35	0.510121	N
2017-08-24	02:55	2017-08-24	03:25	2.5	0.0208333	15.0522	15	0.5	5	N
2013-06-04	02:45:00	2013-06-04	07:45:00	6.4	0.208333	14.9524	15	5	1.28	N
2014-08-18	05:30	2014-08-19	07:00	46.1	1.0625	14.9134	15	25.5	1.80784	N
2006-06-29	09:53:00	2006-06-29	10:23:00	0.4	0.0208333	14.7468	15	0.5	0.8	N
2014-10-28	14:30	2014-10-28	16:50	3.4	0.0972222	14.6369	15	2.33333	1.45714	N
2007-08-11	07:37:00	2007-08-11	14:25:00	12.8	0.283333	14.6296	15	6.8	1.88235	Y
2020-08-03	16:20	2020-08-03	18:15	1	0.0798611	14.5865	15	1.91667	0.521739	N
2017-10-18	06:10	2017-10-18	12:20	3.8	0.256944	14.5476	15	6.16667	0.616216	N
2015-08-18	03:10	2015-08-18	08:40	10.6	0.229167	14.5324	15	5.5	1.92727	N
2008-07-01	04:32:00	2008-07-01	07:28:00	10.8	0.122222	14.5063	15	2.93333	3.68182	N
2006-06-14	05:25:00	2006-06-14	06:42:00	1.5	0.0534722	14.4903	14	1.28333	1.16883	N	prob=2.3%
2019-06-16	21:25	2019-06-16	23:40	4.8	0.09375	14.4572	14	2.25	2.13333	N
2006-09-15	04:05:00	2006-09-15	13:48:00	14.3	0.404861	14.4134	14	9.71667	1.4717	N
2007-07-10	02:44:00	2007-07-10	04:13:00	10.4	0.0618056	14.3997	14	1.48333	7.01124	Y
2013-10-22	22:15:00	2013-10-23	10:40:00	12.7	0.517361	14.3872	14	12.4167	1.02282	N
2017-10-17	04:15	2017-10-17	06:00	1.2	0.0729167	14.3563	14	1.75	0.685714	N
2015-05-22	03:55	2015-05-22	08:40	11.3	0.197917	14.3175	14	4.75	2.37895	N
2008-06-05	04:02:00	2008-06-05	10:53:00	14.2	0.285417	14.2271	14	6.85	2.07299	N
2018-09-06	05:00	2018-09-06	05:05	0.5	0.00347222	14.2213	14	0.0833333	6	N
2017-07-27	17:55	2017-07-27	18:15	7	0.0138889	14.2075	14	0.333333	21	N
2008-08-27	09:53:00	2008-08-27	10:09:00	0.4	0.0111111	14.2015	14	0.266667	1.5	N
2018-08-25	16:05	2018-08-25	16:15	1.2	0.00694444	14.1261	14	0.166667	7.2	N
2008-09-04	00:21:00	2008-09-04	02:53:00	1.7	0.105556	14.1185	14	2.53333	0.671053	N
2015-08-04	14:55	2015-08-04	16:40	7.7	0.0729167	14.1001	14	1.75	4.4	N
2018-09-22	03:30	2018-09-22	07:15	17.1	0.15625	14.0582	14	3.75	4.56	N
2018-05-30	23:30	2018-05-30	23:35	0.3	0.00347222	14.0062	14	0.0833333	3.6	N
2018-05-31	06:15	2018-05-31	10:25	4.9	0.173611	13.9708	14	4.16667	1.176	N
2013-08-03	18:15:00	2013-08-04	16:10:00	47.5	0.913194	13.925	14	21.9167	2.1673	N
2018-10-12	18:45	2018-10-12	19:45	0.7	0.0416667	13.9114	14	1	0.7	N
2016-06-10	01:55	2016-06-10	02:00	0.2	0.00347222	13.9021	14	0.0833333	2.4	N
2007-08-24	12:15:00	2007-08-24	16:10:00	4.5	0.163194	13.8909	14	3.91667	1.14894	N
2018-09-02	18:15	2018-09-03	02:05	7.7	0.326389	13.814	14	7.83333	0.982979	N
2014-08-29	11:35	2014-08-29	12:15	4.5	0.0277778	13.811	14	0.666667	6.75	N
2018-09-27	21:05	2018-09-27	22:20	5.2	0.0520833	13.7882	14	1.25	4.16	N
2017-08-23	16:35	2017-08-23	16:45	2.6	0.00694444	13.7869	14	0.166667	15.6	N
2014-09-17	01:25	2014-09-18	13:15	109.8	1.49306	13.7868	14	35.8333	3.06419	N
2012-08-26	06:15	2012-08-26	07:25	2.2	0.0486111	13.7771	14	1.16667	1.88571	N
2013-05-02	23:40:00	2013-05-03	04:45:00	7.4	0.211806	13.7592	14	5.08333	1.45574	N
2013-10-22	15:40:00	2013-10-22	16:25:00	0.4	0.03125	13.7168	14	0.75	0.533333	N
2012-06-16	22:20	2012-06-16	23:35	0.8	0.0520833	13.6914	14	1.25	0.64	N
2013-07-13	23:55:00	2013-07-14	00:00:00	0.3	0.00347222	13.6269	14	0.0833333	3.6	N
2008-07-18	01:01:00	2008-07-18	01:13:00	0.6	0.00833333	13.6019	14	0.2	3	N
2006-06-07	23:57:00	2006-06-08	20:00:00	14.4	0.835417	13.5535	14	20.05	0.718204	N
2010-06-24	23:30:00	2010-06-25	06:52:00	26.1	0.306944	13.4964	13	7.36667	3.54299	N
2018-08-28	15:25	2018-08-28	15:30	0.6	0.00347222	13.4485	13	0.0833333	7.2	N
2018-10-12	14:55	2018-10-12	15:35	0.4	0.0277778	13.4308	13	0.666667	0.6	N
2006-09-14	20:00:00	2006-09-14	20:39:00	0.8	0.0270833	13.3999	13	0.65	1.23077	N
2007-08-21	18:52:00	2007-08-21	19:33:00	4.7	0.0284722	13.3785	13	0.683333	6.87805	N
2013-10-27	03:40:00	2013-10-27	05:55:00	2.2	0.09375	13.3749	13	2.25	0.977778	N
2013-08-02	20:40:00	2013-08-02	20:45:00	2.3	0.00347222	13.2449	13	0.0833333	27.6	N
2013-07-01	16:55:00	2013-07-01	17:05:00	1.2	0.00694444	13.2174	13	0.166667	7.2	N
2007-08-11	01:16:00	2007-08-11	02:22:00	1.7	0.0458333	13.1598	13	1.1	1.54545	N
2006-06-30	16:53:00	2006-07-01	01:09:00	28.8	0.344444	13.145	13	8.26667	3.48387	N
2013-08-01	19:55:00	2013-08-01	20:10:00	2.4	0.0104167	13.116	13	0.25	9.6	N
2017-09-20	07:25	2017-09-20	12:35	8.5	0.215278	13.0545	13	5.16667	1.64516	N
2012-08-27	17:25	2012-08-27	17:55	1.2	0.0208333	13.0529	13	0.5	2.4	N
2015-08-31	12:15	2015-08-31	16:45	2.8	0.1875	13.0362	13	4.5	0.622222	N
2016-08-27	20:40	2016-08-28	01:55	7	0.21875	13.0265	13	5.25	1.33333	N
2006-08-12	15:00:00	2006-08-12	15:05:00	2.6	0.00347222	13.0231	13	0.0833333	31.2	N
2020-09-10	10:55	2020-09-10	17:35	20.8	0.277778	12.8847	13	6.66667	3.12	N
2018-09-06	16:00	2018-09-06	16:20	9.5	0.0138889	12.8752	13	0.333333	28.5	N
2007-09-25	16:42:00	2007-09-25	18:39:00	1.1	0.08125	12.8638	13	1.95	0.564103	N
2008-08-30	22:05:00	2008-08-31	01:29:00	0.9	0.141667	12.8531	13	3.4	0.264706	N
2015-09-06	03:10	2015-09-06	12:25	17.3	0.385417	12.808	13	9.25	1.87027	N
2007-06-25	21:57:00	2007-06-26	02:00:00	7.2	0.16875	12.8034	13	4.05	1.77778	N
2013-07-26	14:25:00	2013-07-26	15:00:00	2.9	0.0243056	12.7748	13	0.583333	4.97143	N
2009-07-25	16:59:00	2009-07-25	22:45:00	13.8	0.240278	12.6181	13	5.76667	2.39306	N
2008-07-18	14:38:00	2008-07-18	17:20:00	31.5	0.1125	12.5932	13	2.7	11.6667	N
2010-09-18	18:07:00	2010-09-18	18:24:00	0.3	0.0118056	12.5494	13	0.283333	1.05882	N
2018-10-12	03:50	2018-10-12	04:45	1.4	0.0381944	12.5352	13	0.916667	1.52727	N
2016-06-10	20:10	2016-06-11	00:55	3.9	0.197917	12.4773	12	4.75	0.821053	N
2013-07-16	23:45:00	2013-07-17	02:15:00	2.1	0.104167	12.4731	12	2.5	0.84	N
2013-05-08	13:40:00	2013-05-08	13:50:00	0.7	0.00694444	12.4432	12	0.166667	4.2	N
2013-10-19	20:45:00	2013-10-19	21:55:00	1.2	0.0486111	12.43	12	1.16667	1.02857	N
2009-07-25	11:02:00	2009-07-25	11:08:00	0.9	0.00416667	12.4004	12	0.1	9	N
2007-09-25	08:46:00	2007-09-25	10:53:00	1.1	0.0881944	12.2327	12	2.11667	0.519685	N
2015-07-01	01:30	2015-07-01	09:10	32.7	0.319444	12.2272	12	7.66667	4.26522	N
2013-07-27	20:35:00	2013-07-28	00:15:00	13.9	0.152778	12.2163	12	3.66667	3.79091	N
2018-07-06	17:40	2018-07-06	21:55	28.6	0.177083	12.1772	12	4.25	6.72941	N
2013-07-19	03:15:00	2013-07-19	03:20:00	0.1	0.00347222	12.1706	12	0.0833333	1.2	N
2008-08-27	02:21:00	2008-08-27	06:00:00	2.2	0.152083	12.1439	12	3.65	0.60274	N
2013-05-30	00:50:00	2013-05-30	02:00:00	0.5	0.0486111	12.1018	12	1.16667	0.428571	N
2009-08-04	02:42:00	2009-08-04	08:25:00	53.4	0.238194	11.8976	12	5.71667	9.34111	Y
2013-10-21	00:55:00	2013-10-21	06:35:00	6.4	0.236111	11.8744	12	5.66667	1.12941	N
2016-08-05	01:25	2016-08-05	08:05	17.4	0.277778	11.8176	12	6.66667	2.61	N
2013-07-18	19:15:00	2013-07-18	22:20:00	1.6	0.128472	11.7921	12	3.08333	0.518919	N
2013-07-23	23:10:00	2013-07-23	23:35:00	1.4	0.0173611	11.7796	12	0.416667	3.36	N
2018-05-30	16:45	2018-05-30	17:35	2.9	0.0347222	11.7452	12	0.833333	3.48	N
2018-09-13	03:55	2018-09-13	04:00	0.2	0.00347222	11.7291	12	0.0833333	2.4	N
2015-06-18	07:00	2015-06-18	11:35	25.6	0.190972	11.725	12	4.58333	5.58545	N
2017-09-20	02:45	2017-09-20	04:00	1.7	0.0520833	11.7091	12	1.25	1.36	N
2018-05-30	04:00	2018-05-30	04:05	0.1	0.00347222	11.6768	12	0.0833333	1.2	N
2013-07-25	18:30:00	2013-07-25	19:40:00	2.6	0.0486111	11.5858	12	1.16667	2.22857	N
2006-07-30	22:02:00	2006-07-30	22:07:00	0.3	0.00347222	11.581	12	0.0833333	3.6	N
2018-06-08	19:35	2018-06-08	22:20	5.1	0.114583	11.5609	12	2.75	1.85455	N
2010-09-19	18:02:00	2010-09-19	18:36:00	9	0.0236111	11.5226	12	0.566667	15.8824	N
2010-09-10	01:57:00	2010-09-10	07:59:00	33.5	0.251389	11.5069	12	6.03333	5.55249	Y
2019-10-15	00:35	2019-10-15	00:45	0.3	0.00694444	11.4904	11	0.166667	1.8	N
2017-10-12	14:00	2017-10-13	01:10	11.5	0.465278	11.4262	11	11.1667	1.02985	N
2017-06-15	23:30	2017-06-16	08:20	21.7	0.368056	11.4231	11	8.83333	2.4566	N
2013-05-09	14:40:00	2013-05-10	00:00:00	20.5	0.388889	11.4138	11	9.33333	2.19643	N
2007-06-25	14:11:00	2007-06-25	14:54:00	1.1	0.0298611	11.3881	11	0.716667	1.53488	N
2018-08-30	04:05	2018-08-30	04:25	1.5	0.0138889	11.3363	11	0.333333	4.5	N
2019-10-15	06:15	2019-10-15	06:20	0.2	0.00347222	11.2955	11	0.0833333	2.4	N
2016-09-02	02:00	2016-09-02	03:05	1.3	0.0451389	11.2652	11	1.08333	1.2	N
2015-07-29	23:50	2015-07-30	01:10	2	0.0555556	11.2465	11	1.33333	1.5	N
2013-05-02	18:45:00	2013-05-02	19:50:00	2.6	0.0451389	11.0712	11	1.08333	2.4	N
2007-09-08	22:34:00	2007-09-09	16:13:00	10.4	0.735417	11.0563	11	17.65	0.589235	N
2012-08-29	05:40	2012-08-29	05:50	0.2	0.00694444	10.9853	11	0.166667	1.2	N
2006-07-31	12:45:00	2006-07-31	13:29:00	5.1	0.0305556	10.9624	11	0.733333	6.95455	N
2013-10-29	09:05:00	2013-10-29	09:10:00	0.2	0.00347222	10.9439	11	0.0833333	2.4	N
2013-07-20	18:15:00	2013-07-20	23:35:00	12.7	0.222222	10.9395	11	5.33333	2.38125	N
2016-09-28	00:15	2016-09-28	00:25	0.6	0.00694444	10.8767	11	0.166667	3.6	N
2013-07-25	14:55:00	2013-07-25	15:00:00	0.7	0.00347222	10.8114	11	0.0833333	8.4	N
2013-09-11	18:15:00	2013-09-12	00:15:00	6.9	0.25	10.7761	11	6	1.15	N
2012-06-19	02:20	2012-06-19	09:15	26.9	0.288194	10.745	11	6.91667	3.88916	N
2013-07-15	19:35:00	2013-07-15	20:15:00	5.5	0.0277778	10.7134	11	0.666667	8.25	N
2013-05-07	15:40:00	2013-05-07	19:30:00	3.7	0.159722	10.6999	11	3.83333	0.965217	N
2018-08-31	22:45	2018-08-31	23:10	0.4	0.0173611	10.6954	11	0.416667	0.96	N
2016-08-04	11:05	2016-08-04	11:15	0.2	0.00694444	10.6866	11	0.166667	1.2	N
2017-10-22	10:45	2017-10-23	08:45	10.1	0.916667	10.6399	11	22	0.459091	N
2017-09-14	15:25	2017-09-14	16:50	19.8	0.0590278	10.5963	11	1.41667	13.9765	N
2006-06-16	23:57:00	2006-06-17	05:08:00	10	0.215972	10.5813	11	5.18333	1.92926	N
2020-10-20	17:20	2020-10-20	23:25	2.8	0.253472	10.4943	10	6.08333	0.460274	N
2016-08-04	20:30	2016-08-04	21:40	1.3	0.0486111	10.4908	10	1.16667	1.11429	N
2017-08-14	09:00	2017-08-14	10:05	31.5	0.0451389	10.4353	10	1.08333	29.0769	N
2015-09-05	23:30	2015-09-05	23:45	2.8	0.0104167	10.4284	10	0.25	11.2	N
2013-07-12	16:50:00	2013-07-12	17:35:00	0.3	0.03125	10.3666	10	0.75	0.4	N
2017-10-22	00:55	2017-10-22	01:00	0.1	0.00347222	10.3608	10	0.0833333	1.2	N
2018-08-31	15:35	2018-08-31	15:45	1	0.00694444	10.2921	10	0.166667	6	N
2020-07-26	11:55	2020-07-26	14:40	5.5	0.114583	10.1645	10	2.75	2	N
2009-07-12	01:40:00	2009-07-12	09:29:00	4.4	0.325694	10.1379	10	7.81667	0.5629	N
2013-05-23	21:20:00	2013-05-23	22:30:00	8.1	0.0486111	10.0174	10	1.16667	6.94286	N
2016-06-07	07:15	2016-06-07	11:00	12.7	0.15625	10.0135	10	3.75	3.38667	N
2007-08-18	06:38:00	2007-08-18	09:04:00	0.3	0.101389	9.92182	10	2.43333	0.123288	N
2018-09-01	14:10	2018-09-01	15:00	7.9	0.0347222	9.75261	10	0.833333	9.48	N
2013-10-19	00:45:00	2013-10-19	05:25:00	4.1	0.194444	9.75043	10	4.66667	0.878571	N
2020-06-18	06:35	2020-06-18	09:00	2.4	0.100694	9.7409	10	2.41667	0.993103	N
2019-10-14	14:35	2019-10-14	17:45	1.5	0.131944	9.7291	10	3.16667	0.473684	N
2013-07-13	16:25:00	2013-07-13	19:25:00	5.6	0.125	9.72501	10	3	1.86667	N
2010-08-22	01:49:00	2010-08-22	11:07:00	28.3	0.3875	9.69485	10	9.3	3.04301	N
2015-09-05	16:25	2015-09-05	16:35	0.4	0.00694444	9.65183	10	0.166667	2.4	N
2017-05-12	09:40	2017-05-12	09:45	0.3	0.00347222	9.576	10	0.0833333	3.6	N
2018-07-22	16:00	2018-07-22	16:30	2.4	0.0208333	9.45629	9	0.5	4.8	N
2019-10-17	21:10	2019-10-18	04:45	10.4	0.315972	9.44723	9	7.58333	1.37143	N
2010-09-09	02:39:00	2010-09-09	03:07:00	3.4	0.0194444	9.4347	9	0.466667	7.28571	N
2016-06-07	03:30	2016-06-07	03:35	0.5	0.00347222	9.38708	9	0.0833333	6	N
2016-06-03	08:20	2016-06-03	08:50	0.6	0.0208333	9.35214	9	0.5	1.2	N
2006-08-08	16:05:00	2006-08-08	16:53:00	0.7	0.0333333	9.30972	9	0.8	0.875	N
2018-09-12	00:35	2018-09-12	03:15	4	0.111111	9.27395	9	2.66667	1.5	N
2019-09-24	22:30	2019-09-25	13:35	10.2	0.628472	9.20589	9	15.0833	0.676243	N
2020-10-20	06:50	2020-10-20	13:10	1.6	0.263889	9.16202	9	6.33333	0.252632	N
2013-05-17	14:15:00	2013-05-17	14:25:00	0.8	0.00694444	9.13575	9	0.166667	4.8	N
2018-07-23	13:10	2018-07-23	13:25	0.6	0.0104167	9.13161	9	0.25	2.4	N
2008-08-30	10:41:00	2008-08-30	14:23:00	4.6	0.154167	9.11414	9	3.7	1.24324	N
2018-07-23	16:35	2018-07-23	16:55	9.3	0.0138889	9.11146	9	0.333333	27.9	N
2015-07-30	15:35	2015-07-30	19:15	15.3	0.152778	9.09646	9	3.66667	4.17273	N
2019-10-14	11:10	2019-10-14	11:20	0.4	0.00694444	9.06183	9	0.166667	2.4	N
2016-09-01	06:40	2016-09-01	11:25	3.3	0.197917	8.96322	9	4.75	0.694737	N
2020-07-28	17:05	2020-07-28	17:20	1	0.0104167	8.89668	9	0.25	4	N
2015-08-25	06:00	2015-08-25	09:30	14.5	0.145833	8.84658	9	3.5	4.14286	N
2020-10-19	23:50	2020-10-20	00:30	0.3	0.0277778	8.81186	9	0.666667	0.45	N
2013-05-02	05:20:00	2013-05-02	08:05:00	1.6	0.114583	8.75952	9	2.75	0.581818	N
2016-09-04	03:35	2016-09-04	06:50	13.7	0.135417	8.70287	9	3.25	4.21538	N
2016-08-04	03:45	2016-08-04	07:30	1.9	0.15625	8.69981	9	3.75	0.506667	N
2015-10-19	05:40	2015-10-19	08:15	1.6	0.107639	8.61753	9	2.58333	0.619355	N
2015-05-18	17:55	2015-05-18	18:10	1	0.0104167	8.54493	9	0.25	4	N
2016-05-12	19:50	2016-05-12	20:35	3.6	0.03125	8.54295	9	0.75	4.8	N
2020-09-06	08:30	2020-09-06	12:50	19.4	0.180556	8.45663	8	4.33333	4.47692	N
2016-08-02	15:10	2016-08-02	16:20	2.5	0.0486111	8.24022	8	1.16667	2.14286	N
2009-09-15	00:22:00	2009-09-15	04:14:00	11.5	0.161111	8.22377	8	3.86667	2.97414	N
2020-08-31	11:05	2020-08-31	11:15	0.7	0.00694444	8.21533	8	0.166667	4.2	N
2017-06-15	05:35	2017-06-15	05:55	3.3	0.0138889	8.17461	8	0.333333	9.9	N
2018-05-29	20:45	2018-05-29	22:45	4.3	0.0833333	8.11844	8	2	2.15	N
2009-09-20	14:03:00	2009-09-20	16:58:00	4.9	0.121528	8.10075	8	2.91667	1.68	N
2020-10-19	02:35	2020-10-19	05:45	1	0.131944	8.08104	8	3.16667	0.315789	N
2016-08-31	23:40	2016-09-01	00:50	0.7	0.0486111	8.02994	8	1.16667	0.6	N
2017-05-24	19:30	2017-05-25	01:00	2.3	0.229167	8.00907	8	5.5	0.418182	N
2019-08-20	01:00	2019-08-20	01:55	3.3	0.0381944	8.00841	8	0.916667	3.6	N
2015-10-18	14:50	2015-10-18	14:55	0.8	0.00347222	7.92948	8	0.0833333	9.6	N
2013-06-02	00:15:00	2013-06-02	05:30:00	13.6	0.21875	7.89438	8	5.25	2.59048	N
2006-08-10	14:52:00	2006-08-10	14:56:00	0.3	0.00277778	7.72074	8	0.0666667	4.5	N
2020-09-05	09:00	2020-09-05	09:20	1.6	0.0138889	7.66741	8	0.333333	4.8	N
2017-05-24	05:50	2017-05-24	05:55	0.2	0.00347222	7.66443	8	0.0833333	2.4	N
2016-09-30	16:50	2016-09-30	17:55	1.2	0.0451389	7.64645	8	1.08333	1.10769	N
2014-09-02	14:15	2014-09-02	14:25	1.2	0.00694444	7.64496	8	0.166667	7.2	N
2006-08-05	20:30:00	2006-08-05	20:47:00	2.1	0.0118056	7.62932	8	0.283333	7.41176	N
2013-07-05	15:00:00	2013-07-05	22:05:00	26.2	0.295139	7.58874	8	7.08333	3.69882	N
2017-06-11	04:45	2017-06-11	04:50	0.3	0.00347222	7.58606	8	0.0833333	3.6	N
2014-10-24	03:10	2014-10-24	03:25	1.2	0.0104167	7.56386	8	0.25	4.8	N
2020-08-29	02:50	2020-08-29	02:55	0.1	0.00347222	7.51775	8	0.0833333	1.2	N
2020-08-28	22:35	2020-08-28	23:50	1.3	0.0520833	7.49111	7	1.25	1.04	N
2013-06-21	18:00:00	2013-06-22	01:10:00	33.3	0.298611	7.46978	7	7.16667	4.64651	N
2013-10-17	05:00:00	2013-10-17	05:05:00	0.3	0.00347222	7.46306	7	0.0833333	3.6	N
2017-05-14	15:00	2017-05-14	21:50	9.6	0.284722	7.44845	7	6.83333	1.40488	N
2006-08-07	17:41:00	2006-08-07	19:14:00	3.7	0.0645833	7.39841	7	1.55	2.3871	N
2016-10-01	12:10	2016-10-01	14:20	7	0.0902778	7.37597	7	2.16667	3.23077	N
2015-07-13	11:15	2015-07-13	11:30	0.3	0.0104167	7.33856	7	0.25	1.2	N
2020-10-18	08:20	2020-10-18	09:30	0.7	0.0486111	7.27885	7	1.16667	0.6	N
2019-08-27	14:20	2019-08-28	04:10	21.2	0.576389	7.21302	7	13.8333	1.53253	N
2008-09-03	07:21:00	2008-09-03	14:26:00	8.6	0.295139	7.13329	7	7.08333	1.21412	N
2010-09-01	03:47:00	2010-09-01	05:02:00	0.9	0.0520833	7.12095	7	1.25	0.72	N
2010-09-02	07:19:00	2010-09-02	14:08:00	5.8	0.284028	7.04061	7	6.81667	0.850856	N
2016-07-29	17:15	2016-07-29	19:30	7.4	0.09375	7.01572	7	2.25	3.28889	N
2006-08-11	23:40:00	2006-08-12	00:11:00	6.8	0.0215278	7.01435	7	0.516667	13.1613	N
2007-08-20	16:55:00	2007-08-20	18:57:00	10.2	0.0847222	6.95881	7	2.03333	5.01639	N
2016-06-04	22:25	2016-06-05	03:45	10.1	0.222222	6.91021	7	5.33333	1.89375	N
2009-09-27	04:08:00	2009-09-27	10:01:00	7.7	0.245139	6.90204	7	5.88333	1.30878	N
2014-10-19	16:35	2014-10-19	19:50	9.5	0.135417	6.88092	7	3.25	2.92308	N
2007-07-01	15:23:00	2007-07-01	15:31:00	1.1	0.00555556	6.84952	7	0.133333	8.25	N
2016-10-29	04:05	2016-10-29	18:55	17.6	0.618056	6.8412	7	14.8333	1.18652	N
2013-10-14	20:20:00	2013-10-15	01:40:00	5.3	0.222222	6.81068	7	5.33333	0.99375	N
2015-05-31	01:05	2015-05-31	02:10	4.1	0.0451389	6.77916	7	1.08333	3.78462	N
2020-08-09	13:20	2020-08-09	15:30	13.9	0.0902778	6.76047	7	2.16667	6.41538	N
2016-10-17	04:15	2016-10-17	14:30	19	0.427083	6.75637	7	10.25	1.85366	N
2009-09-24	17:01:00	2009-09-24	22:47:00	3.6	0.240278	6.73611	7	5.76667	0.624277	N
2018-05-03	23:30	2018-05-04	02:10	1	0.111111	6.72	7	2.66667	0.375	N
2019-06-01	06:50	2019-06-01	07:50	0.3	0.0416667	6.65037	7	1	0.3	N
2006-08-05	06:27:00	2006-08-05	07:12:00	0.6	0.03125	6.63802	7	0.75	0.8	N
2016-10-16	16:50	2016-10-16	16:55	0.2	0.00347222	6.58222	7	0.0833333	2.4	N
2013-05-23	01:55:00	2013-05-23	05:20:00	4.5	0.142361	6.53358	7	3.41667	1.31707	N
2020-06-09	05:50	2020-06-09	06:45	0.4	0.0381944	6.49534	6	0.916667	0.436364	N
2017-06-13	00:00	2017-06-13	00:10	0.7	0.00694444	6.46228	6	0.166667	4.2	N
2006-06-23	23:48:00	2006-06-23	23:54:00	0.1	0.00416667	6.39165	6	0.1	1	N
2018-05-03	20:40	2018-05-03	20:45	0.1	0.00347222	6.384	6	0.0833333	1.2	N
2019-06-23	06:55	2019-06-23	13:35	22.1	0.277778	6.35532	6	6.66667	3.315	N
2006-09-05	21:39:00	2006-09-05	22:16:00	1.8	0.0256944	6.3423	6	0.616667	2.91892	N
2020-08-30	23:10	2020-08-31	02:20	2.2	0.131944	6.30361	6	3.16667	0.694737	N
2020-07-31	23:10	2020-08-01	03:25	18	0.177083	6.24732	6	4.25	4.23529	N
2013-05-22	21:25:00	2013-05-22	21:30:00	0.2	0.00347222	6.19529	6	0.0833333	2.4	N
2013-10-18	01:40:00	2013-10-18	05:30:00	4.7	0.159722	6.18991	6	3.83333	1.22609	N
2020-10-18	02:35	2020-10-18	02:55	0.9	0.0138889	6.12029	6	0.333333	2.7	N
2015-07-15	04:05	2015-07-15	13:25	46.9	0.388889	6.08926	6	9.33333	5.025	N
2017-05-24	01:50	2017-05-24	02:20	1.7	0.0208333	6.0789	6	0.5	3.4	N
2013-10-02	01:15:00	2013-10-02	10:35:00	31.1	0.388889	6.06372	6	9.33333	3.33214	N
2020-06-10	03:30	2020-06-10	04:00	1.1	0.0208333	6.03374	6	0.5	2.2	N
2015-05-21	14:30	2015-05-21	16:35	10.1	0.0868056	6.02742	6	2.08333	4.848	N
2017-06-15	00:50	2017-06-15	02:15	3	0.0590278	5.87331	6	1.41667	2.11765	N
2008-08-25	15:53:00	2008-08-25	19:27:00	8.4	0.148611	5.76917	6	3.56667	2.35514	N
2009-09-14	19:11:00	2009-09-14	19:37:00	2.5	0.0180556	5.61977	6	0.433333	5.76923	N
2019-06-04	17:50	2019-06-04	18:00	0.4	0.00694444	5.6084	6	0.166667	2.4	N
2020-06-24	01:35	2020-06-24	06:15	22.3	0.194444	5.57111	6	4.66667	4.77857	N
2020-10-16	18:45	2020-10-16	19:10	0.3	0.0173611	5.5611	6	0.416667	0.72	N
2019-08-22	13:45	2019-08-22	18:30	12.7	0.197917	5.54143	6	4.75	2.67368	N
2009-09-11	17:11:00	2009-09-11	17:42:00	7.2	0.0215278	5.50214	6	0.516667	13.9355	N
2020-05-17	00:00	2020-05-17	06:45	35.7	0.28125	5.47887	5	6.75	5.28889	N
2014-06-04	18:00	2014-06-04	18:40	23.1	0.0277778	5.44219	5	0.666667	34.65	N
2018-09-17	16:50	2018-09-18	16:20	15.3	0.979167	5.43563	5	23.5	0.651064	N
2012-09-01	22:35	2012-09-02	05:35	19.6	0.291667	5.40496	5	7	2.8	N
2020-06-23	22:00	2020-06-23	22:05	0.4	0.00347222	5.33398	5	0.0833333	4.8	N
2018-05-29	02:00	2018-05-29	03:45	3.4	0.0729167	5.32748	5	1.75	1.94286	N
2009-08-21	23:36:00	2009-08-22	00:39:00	1.4	0.04375	5.31148	5	1.05	1.33333	N
2009-09-08	15:44:00	2009-09-08	15:58:00	3.7	0.00972222	5.29491	5	0.233333	15.8571	N
2016-10-26	18:45	2016-10-26	19:45	0.9	0.0416667	4.96332	5	1	0.9	N
2015-05-16	01:20	2015-05-16	04:25	7.5	0.128472	4.94328	5	3.08333	2.43243	N
2006-06-27	07:17:00	2006-06-27	10:33:00	18.2	0.136111	4.92635	5	3.26667	5.57143	N
2010-08-21	13:59:00	2010-08-21	18:56:00	5.3	0.20625	4.90789	5	4.95	1.07071	N
2014-09-16	17:50	2014-09-16	18:05	10.1	0.0104167	4.80022	5	0.25	40.4	N
2013-05-20	20:50:00	2013-05-20	23:15:00	4	0.100694	4.77674	5	2.41667	1.65517	N
2006-09-08	04:22:00	2006-09-08	13:19:00	31.8	0.372917	4.76558	5	8.95	3.55307	N
2010-08-15	17:19:00	2010-08-15	17:24:00	0.3	0.00347222	4.6893	5	0.0833333	3.6	N
2019-05-31	07:45	2019-05-31	11:55	2.5	0.173611	4.5531	5	4.16667	0.6	N
2010-09-25	21:34:00	2010-09-26	07:42:00	20.6	0.422222	4.53357	5	10.1333	2.03289	N
2018-05-14	00:25	2018-05-14	00:50	8.2	0.0173611	4.52297	5	0.416667	19.68	N
2020-06-08	22:55	2020-06-09	00:50	2	0.0798611	4.47674	4	1.91667	1.04348	N
2015-06-06	00:55	2015-06-06	01:05	0.3	0.00694444	4.4482	4	0.166667	1.8	N
2010-08-17	14:39:00	2010-08-17	14:43:00	0.1	0.00277778	4.42183	4	0.0666667	1.5	N
2015-09-20	06:00	2015-09-20	07:45	2.1	0.0729167	4.40553	4	1.75	1.2	N
2020-10-30	01:35	2020-10-30	04:30	2.4	0.121528	4.39984	4	2.91667	0.822857	N
2015-06-05	04:20	2015-06-05	04:40	0.4	0.0138889	4.357	4	0.333333	1.2	N
2019-05-29	05:10	2019-05-29	05:25	1	0.0104167	4.3491	4	0.25	4	N
2015-10-08	02:50	2015-10-09	13:25	22.8	1.44097	4.34007	4	34.5833	0.659277	N
2014-10-28	01:40	2014-10-28	10:35	11.9	0.371528	4.334	4	8.91667	1.33458	N
2019-06-04	14:40	2019-06-04	14:50	1.3	0.00694444	4.2644	4	0.166667	7.8	N
2020-10-05	22:05	2020-10-06	07:15	14.5	0.381944	4.21046	4	9.16667	1.58182	N
2014-05-30	18:25	2014-05-30	18:45	7	0.0138889	4.18283	4	0.333333	21	N
2019-10-07	08:40	2019-10-07	09:05	1.3	0.0173611	4.17287	4	0.416667	3.12	N
2017-05-11	23:40	2017-05-12	03:25	5.8	0.15625	4.032	4	3.75	1.54667	N
2006-09-05	12:38:00	2006-09-05	13:37:00	2.6	0.0409722	3.98357	4	0.983333	2.64407	N
2010-08-16	20:04:00	2010-08-16	20:14:00	0.4	0.00694444	3.95194	4	0.166667	2.4	N
2014-10-27	17:50	2014-10-27	18:00	0.3	0.00694444	3.95183	4	0.166667	1.8	N
2007-07-07	03:06:00	2007-07-07	09:50:00	19.4	0.280556	3.94882	4	6.73333	2.88119	N
2016-10-28	18:15	2016-10-28	18:35	3	0.0138889	3.88589	4	0.333333	9	N
2016-05-19	22:40	2016-05-20	00:35	17.9	0.0798611	3.87514	4	1.91667	9.33913	N
2010-08-21	01:51:00	2010-08-21	03:33:00	0.8	0.0708333	3.85852	4	1.7	0.470588	N
2016-10-08	08:40	2016-10-08	09:05	0.2	0.0173611	3.74203	4	0.416667	0.48	N
2009-08-29	11:43:00	2009-08-29	13:18:00	30.4	0.0659722	3.66922	4	1.58333	19.2	N
2007-06-24	10:26:00	2007-06-24	11:50:00	10.5	0.0583333	3.55542	4	1.4	7.5	N
2020-10-28	16:55	2020-10-28	19:15	1.8	0.0972222	3.37157	3	2.33333	0.771429	N
2020-10-16	08:55	2020-10-16	14:10	2.1	0.21875	3.36146	3	5.25	0.4	N
2010-09-08	04:30:00	2010-09-08	09:04:00	6.9	0.190278	3.34786	3	4.56667	1.51095	N
2010-06-20	02:02:00	2010-06-20	12:32:00	18.3	0.4375	3.30875	3	10.5	1.74286	N
2009-07-18	15:25:00	2009-07-18	16:11:00	20.5	0.0319444	3.17753	3	0.766667	26.7391	N
2014-05-07	03:00	2014-05-07	08:25	19.6	0.225694	3.12046	3	5.41667	3.61846	N
2015-06-09	01:45	2015-06-09	09:20	26.3	0.315972	3.06863	3	7.58333	3.46813	N
2012-06-16	07:40	2012-06-16	18:15	12.2	0.440972	3.03501	3	10.5833	1.15276	N
2010-08-20	05:03:00	2010-08-20	05:21:00	1.1	0.0125	2.81436	3	0.3	3.66667	N
2018-05-13	09:20	2018-05-13	11:45	2	0.100694	2.76883	3	2.41667	0.827586	N
2006-09-30	06:57:00	2006-09-30	13:31:00	11.2	0.273611	2.69074	3	6.56667	1.70558	N
2015-09-22	12:50	2015-09-22	17:00	3.5	0.173611	2.68953	3	4.16667	0.84	N
2020-06-14	04:00	2020-06-14	11:20	16.2	0.305556	2.64359	3	7.33333	2.20909	N
2020-09-04	18:40	2020-09-04	19:10	5.7	0.0208333	2.61961	3	0.5	11.4	N
2016-10-12	22:20	2016-10-13	05:30	11	0.298611	2.58232	3	7.16667	1.53488	N
2018-05-23	05:30	2018-05-23	07:25	1.7	0.0798611	2.48398	2	1.91667	0.886957	N
2015-10-03	23:30	2015-10-04	07:35	4.3	0.336806	2.47993	2	8.08333	0.531959	N
2012-07-12	23:45	2012-07-13	19:00	57.9	0.802083	2.4672	2	19.25	3.00779	N
2018-10-30	06:30	2018-10-30	08:40	1.5	0.0902778	2.36309	2	2.16667	0.692308	N
2018-05-27	05:25	2018-05-27	08:10	4.4	0.114583	2.34802	2	2.75	1.6	N
2014-09-14	09:25	2014-09-14	09:55	4.6	0.0208333	2.17827	2	0.5	9.2	N
2010-06-19	20:12:00	2010-06-19	20:21:00	0.8	0.00625	2.17338	2	0.15	5.33333	N
2017-10-03	20:05	2017-10-03	20:15	2.7	0.00694444	2.16056	2	0.166667	16.2	N
2014-05-05	00:30	2014-05-05	00:45	1.2	0.0104167	2.15161	2	0.25	4.8	N
2017-10-10	22:20	2017-10-11	08:10	12.1	0.409722	2.01867	2	9.83333	1.23051	N
2014-10-12	05:50	2014-10-12	15:35	16.8	0.40625	1.99775	2	9.75	1.72308	N
2009-08-28	03:14:00	2009-08-28	04:33:00	2.8	0.0548611	1.82826	2	1.31667	2.12658	N
2019-10-13	00:20	2019-10-13	05:00	10	0.194444	1.80827	2	4.66667	2.14286	N
2019-05-28	10:35	2019-05-28	11:40	2.8	0.0451389	1.80184	2	1.08333	2.58462	N
2019-06-12	23:45	2019-06-13	02:50	24.5	0.128472	1.63615	2	3.08333	7.94595	N
2012-06-14	00:10	2012-06-14	01:05	2.2	0.0381944	1.58928	2	0.916667	2.4	N
2015-10-01	08:05	2015-10-01	11:40	1.7	0.149306	1.54608	2	3.58333	0.474419	N
2020-05-02	01:40	2020-05-02	02:10	5.4	0.0208333	1.428	1	0.5	10.8	N
2016-07-27	19:05	2016-07-27	22:10	6.4	0.128472	1.39468	1	3.08333	2.07568	N
2017-10-10	17:00	2017-10-10	18:55	0.6	0.0798611	1.31557	1	1.91667	0.313043	N
2014-10-11	19:25	2014-10-11	19:40	0.3	0.0104167	1.30487	1	0.25	1.2	N
2017-06-06	01:55	2017-06-06	06:35	17.5	0.194444	0.845899	1	4.66667	3.75	N
2019-05-27	09:35	2019-05-27	10:40	0.7	0.0451389	0.825052	1	1.08333	0.646154	N
2015-10-31	22:05	2015-10-31	23:00	0.7	0.0381944	0.804803	1	0.916667	0.763636	N
2016-05-10	22:35	2016-05-11	03:00	10.9	0.184028	0.74592	1	4.41667	2.46792	N
2020-05-16	19:55	2020-05-16	20:40	5.4	0.03125	0.606875	1	0.75	7.2	N
2014-09-14	04:50	2014-09-14	05:55	1.5	0.0451389	0.589769	1	1.08333	1.38462	N
2008-06-04	14:44:00	2008-06-04	20:39:00	15.4	0.246528	0.554115	1	5.91667	2.60282	N
2007-06-08	23:08:00	2007-06-09	12:17:00	31.1	0.547917	0.52519	1	13.15	2.36502	N
2014-05-02	22:20	2014-05-02	23:45	1.5	0.0590278	0.504	1	1.41667	1.05882	N
2018-10-29	15:15	2018-10-29	17:55	1.2	0.111111	0.445022	0	2.66667	0.45	N
2020-05-01	07:35	2020-05-01	08:10	0.7	0.0243056	0.42	0	0.583333	1.2	N
2006-06-07	06:19:00	2006-06-07	07:38:00	14.6	0.0548611	0.365509	0	1.31667	11.0886	N
2013-09-27	11:55:00	2013-09-27	18:45:00	13.6	0.284722	0.35115	0	6.83333	1.99024	N
2009-06-25	23:53:00	2009-06-26	04:45:00	31.5	0.202778	0.336	0	4.86667	6.4726	N
2015-05-08	21:35	2015-05-08	23:30	15	0.0798611	0.336	0	1.91667	7.82609	N
2018-05-03	06:20	2018-05-03	16:25	6.7	0.420139	0.336	0	10.0833	0.664463	N
2007-06-02	02:05:00	2007-06-02	02:06:00	0.2	0.000694444	0.252	0	0.0166667	12	N
2010-06-17	01:45:00	2010-06-17	02:12:00	2	0.01875	0.252	0	0.45	4.44444	N
2014-05-25	18:45	2014-05-25	21:05	8.8	0.0972222	0.252	0	2.33333	3.77143	N
2016-07-26	18:05	2016-07-26	18:15	0.9	0.00694444	0.168328	0	0.166667	5.4	N
2013-05-01	02:55:00	2013-05-01	05:10:00	11.3	0.09375	0.168	0	2.25	5.02222	N
2012-06-12	15:50	2012-06-12	15:55	1.2	0.00347222	0	0	0.0833333	14.4	N
2016-05-09	18:20	2016-05-09	18:25	0.6	0.00347222	0	0	0.0833333	7.2	N
2017-05-11	15:45	2017-05-11	20:40	4.4	0.204861	0	0	4.91667	0.894915	N
