# Supplementary material for: Investigation of the functional relationship between antecedent rainfall and the probability of debris flow occurrence in Jiangjia Gully, China
Source: Copernicus journal article supplement (doi:10.5194/hess-2022-263), 2022-09-05
Supplement: Supplementary file 2 [file appendix 2-f(D)and CFD(D).xlsx]

## Sheet: Sheet1
D	percetange	accumulating	quantity		CFD-C value
0.5	0.248629	0.248629	272		0.8233
1	0.127971	0.3766	140		0.7513
1.5	0.0676417	0.444241	74		0.736008
2	0.0648995	0.509141	71		0.753455
2.5	0.0648995	0.57404	71		0.78693
3	0.0374771	0.611517	41		0.801757
3.5	0.0502742	0.661792	55		0.834771
4	0.0393053	0.701097	43		0.860396
4.5	0.0255941	0.726691	28		0.874824
5	0.0319927	0.758684	35		0.897493
5.5	0.0255941	0.784278	28		0.91516
6	0.0191956	0.803473	21		0.927514
6.5	0.0210238	0.824497	23		0.942561
7	0.023766	0.848263	26		0.96105
7.5	0.0219378	0.870201	24		0.978287
8	0.0146252	0.884826	16		0.988693
8.5	0.00822669	0.893053	9		0.993107
9	0.0127971	0.90585	14		1.00244
9.5	0.0109689	0.916819	12		1.01024
10	0.0109689	0.927788	12		1.0183
10.5	0.00822669	0.936015	9		1.02384
11	0.00457038	0.940585	5		1.02592
11.5	0.00365631	0.944241	4		1.02727
12	0.00365631	0.947898	4		1.02878
12.5	0.00457038	0.952468	5		1.03133
13	0.000914077	0.953382	1		1.03036
13.5	0.00457038	0.957952	5		1.03316
14	0.00457038	0.962523	5		1.03606
14.5	0.00182815	0.964351	2		1.03632
15	0.00182815	0.966179	2		1.03665
15.5	0.00274223	0.968921	3		1.03798
16	0.000914077	0.969835	1		1.03756
16.5	0.00182815	0.971664	2		1.03811
17	0.00274223	0.974406	3		1.03964
17.5	0.000914077	0.97532	1		1.0394
18	0.00182815	0.977148	2		1.04012
18.5	0.00182815	0.978976	2		1.0409
19.5	0.00182815	0.980804			1.04075
20	0.000914077	0.981718	2		1.04073
20.5	0.00182815	0.983547	1		1.04167
21	0.000914077	0.984461	2		1.04172
21.5	0.000914077	0.985375	1		1.04181
22	0.000914077	0.986289	1		1.04193
22.5	0.000914077	0.987203	1		1.04208
23.5	0.000914077	0.988117	1		1.04154
24	0.00182815	0.989945			1.04268
24.5	0.000914077	0.990859	1		1.04293
26	0.00182815	0.992687	2		1.04288
27.5	0.000914077	0.993601	1		1.04209
29	0.000914077	0.994516			1.04144
33.5	0.000914077	0.99543			1.03836
34	0.000914077	0.996344	2		1.03888
35	0.000914077	0.997258			1.03904
35.5	0.000914077	0.998172			1.03959
36	0.000914077	0.999086	1		1.04015
40	0.000914077	1	1		1.03848
			1		C=1.04
