# Supplementary material for: Investigation of the functional relationship between antecedent rainfall and the probability of debris flow occurrence in Jiangjia Gully, China
Source: Copernicus journal article supplement (doi:10.5194/hess-2022-263), 2022-09-05
Supplement: Supplementary file [file hess-2022-263-AC2-supplement.pdf]

### **Response to Reviewer2**

The authors appreciate the reviewer to carefully review our manuscript. The reviewer has given some very professional suggestions. The authors believe that the professional suggestions will be very helpful to improve the readability of our manuscript.

According to the author's understanding, the presented suggestions by the reviewer are summarized into the following three points: (1) the necessary of classifying the stages into the stage 3, stage 4; (2) more detailed explanation on the stages in Fig.4 is needed; (3) more works are necessary for assessing the relation between Pdf and AEP.

All of the suggestions are so important for the authors, we will totally accept the three comments and try our best to modify our manuscript.
